1            **Interferon Beta-1 $\alpha$  ring prophylaxis to reduce household transmission of SARS-CoV-2: the**  
2            **Containing Coronavirus Disease-19 randomized clinical trial**

3    **Authors**

4    José A. Castro-Rodriguez, PhD  
5    Pontifical Catholic University of Chile

6    Eleanor N. Fish, PhD  
7    University of Toronto

8    Tobi Kollmann, PhD  
9    Telethon Kids Institute

10    Carolina Iturriaga, RN  
11    Pontifical Catholic University of Chile

12    Yuliya Karpievitch, PhD  
13    Telethon Kids Institute

14    Casey Shannon, BSc  
15    Prevention of Organ Failure (PROOF) Centre of Excellence

16    Virginia Chen, BSc  
17    Prevention of Organ Failure (PROOF) Centre of Excellence

18    Robert Balshaw, PhD  
19    Centre for Healthcare Innovation, University of Manitoba

20    Samuel T. Montgomery, PhD  
21    Telethon Kids Institute

22    Joseph Ho, MSc  
23    Telethon Kids Institute

24    Rym Ben Othman, PhD  
25    Telethon Kids Institute

26    Radhouana Aniba, PhD  
27    Telethon Kids Institute

28    Francisca Gidi-Yunge, DDS  
29    Pontifical Catholic University of Chile

30    Lucy Hartnell, MSc  
31    Telethon Kids Institute

32    Guillermo Pérez-Mateluna, Biotech  
33    Pontifical Catholic University of Chile

34    Marcela Urzúa, RN  
35    Pontifical Catholic University of Chile

36    Scott Tebbutt, PhD  
37    Prevention of Organ Failure (PROOF) Centre of Excellence

38    Diego García-Huidobro, PhD

39 Pontifical Catholic University of Chile

40 Cecilia Perret, MD

41 Pontifical Catholic University of Chile

42 Arturo Borzutzky, MD

43 Pontifical Catholic University of Chile

44 Stephen M. Stick, PhD

45 Telethon Kids Institute

46

47 **Corresponding author:** Professor Stephen Stick

48 [stephen.stick@health.wa.gov.au](mailto:stephen.stick@health.wa.gov.au)

49 **Abstract (351 words)**

50 **Importance:** Evidence suggests that early, robust type 1 interferon responses to SARS-CoV-2 are  
51 critical determinants for COVID-19 disease outcomes, accelerating viral clearance and limiting viral  
52 shedding.

53 **Objective:** We undertook a ring prophylaxis study to determine whether pegylated IFN $\beta$ -1 $\alpha$  could  
54 reduce SARS-CoV-2 household transmission.

55 **Design:** A cluster randomized clinical trial of pegylated IFN $\beta$ -1 $\alpha$  conducted in Santiago, Chile.  
56 Recruitment was conducted between December 4<sup>th</sup> 2020, and 31<sup>st</sup> May 2021, with the last follow-up  
57 completed June 29<sup>th</sup> 2021.

58 **Setting:** The study was conducted across 341 households in the metropolitan area of Santiago, Chile.

59 **Participants:** Index cases were identified from databases of those with confirmed SARS-CoV-2 from  
60 COVID-19 clinics and emergency room visits in Santiago, Chile. 5,154 index cases were assessed for  
61 eligibility, 1,372 index cases were invited to participate, and 341 index cases and their household  
62 contacts (n = 831) were enrolled in the study.

63 **Intervention:** Households were cluster randomized to receive 125 $\mu$ g subcutaneous pegylated IFN $\beta$ -1 $\alpha$   
64 (n = 172 households, 607 participants), or standard care (n = 169 households, 565 participants).

65 **Main Outcome(s) and Measure(s):** Frequentist and Bayesian analyses were undertaken to determine  
66 the effects of treatment on (i) reducing viral shedding in index cases and (ii) reducing viral  
67 transmission to treatment-eligible household contacts. Four secondary outcomes were assessed  
68 including duration of viral shedding, effects on viral transmission and seroconversion, incidence of  
69 hospitalization, and incidence and severity of reported adverse events. A post-hoc 'at risk population'  
70 was defined as households where the index case was positive at the start of the study and there was  
71 at least one treatment eligible contact in a household who tested negative for SARS-CoV-2.

72 **Results:** In total, 1172 participants in 341 households underwent randomization, with 607 assigned to  
73 receive IFN $\beta$ -1 $\alpha$  and 565 to standard care. Based on intention to treat and per protocol analyses,  
74 IFN $\beta$ -1 $\alpha$  treatment was ineffective. However, in the 'at risk' population, the relative risk of infection  
75 was reduced by 23% in treated individuals and that there was a 95% probability that IFN $\beta$ -1 $\alpha$  reduced  
76 household transmission

77 **Conclusions and Relevance:** Ring prophylaxis with IFN $\beta$ -1 $\alpha$  reduces the probability of SARS-CoV-2  
78 transmission within a household.

79 **Trial Registration:** Clinicaltrials.gov identifier: NCT04552379

80

81 **Introduction (Words 3284)**

82 The SARS-CoV-2 pandemic has claimed over six million lives. Despite the rapid development and  
83 deployment of vaccines in many countries, the number of new cases worldwide still exceeds 500,000  
84 daily (<https://covid19.who.int>). With each wave of the pandemic, health systems have been  
85 challenged and the likelihood of emergence of mutant strains of the virus remains. Mutated strains  
86 may be more transmissible <sup>1,2</sup>, cause more severe disease than the original pandemic strain of SARS-  
87 CoV-2 <sup>3</sup> and have the potential to evade available vaccines <sup>4,5</sup>. Whilst widespread vaccination has had  
88 success limiting the trajectory of the pandemic, the emergence of the omicron variants demonstrated  
89 that even with mutations that appear to cause less severe disease <sup>6</sup>, high transmission despite  
90 immunization could still result in significant pressures on health services <sup>7</sup>.

91  
92 The solution to halting any pandemic is ending community transmission. During the current  
93 pandemic, measures such as healthy hygiene, self-isolation when sick, physical-distancing and use of  
94 facemasks have all been effective <sup>8</sup>. Moreover, expedited public health responses such as extensive  
95 contact-tracing, testing for infection and community lockdowns have all been effective methods to  
96 curb transmission <sup>9</sup>. International and local border closures plus strict quarantine measures have  
97 reduced community transmission to zero for periods in countries such as Australia and New Zealand  
98 <sup>10,11</sup>. However, in these countries and elsewhere, as restrictions are relaxed, localized outbreaks have  
99 occurred <sup>12</sup> that have required rapid, community-wide responses to again suppress transmission.  
100 Importantly, these community constraints cause unprecedented civil disruption and come at  
101 enormous economic <sup>13,14</sup> and social costs <sup>15,16</sup>.

102

103

104 Since the evolution of dominant SARS-CoV-2 virus cannot be easily predicted <sup>17</sup>, there remains a need  
105 to identify interventions that can be rapidly deployed should highly pathogenic strains emerge despite  
106 high levels of community immunization. Furthermore, preparations for the next pandemic must  
107 include strategies to limit the potential for infection and transmission on first contact with pathogenic  
108 respiratory viruses.

109

110 One of the many therapeutic approaches investigated that appeared clinically useful early in the  
111 course of the pandemic was treatment with type 1 interferons (IFNs). Randomized, controlled studies  
112 suggest that IFNs offer clinical benefits in moderate <sup>18</sup> and severe disease <sup>19,20</sup> }, reduce the duration  
113 of viral shedding <sup>21</sup> and prevent infection in front-line hospital workers <sup>22</sup>. Nonetheless, IFNs are not  
114 generally recommended for treatment of proven cases of Covid-19 <sup>23</sup>.

115

116 Since IFNs are sentinel innate immune signalling molecules produced early after first contact with viral  
117 pathogens <sup>24-26</sup>, we postulated that prophylactic IFN treatment might reduce susceptibility to infection  
118 of uninfected contacts of individuals with SARS-CoV-2 infection. Such post-exposure prophylaxis could  
119 provide non-specific, antiviral protection to curb episodic viral outbreaks <sup>27</sup>, help suppress community  
120 transmission, even in vaccinated populations, and therefore reduce the risk of emergence of  
121 dangerous mutations <sup>4,28</sup>.

122

123 We therefore undertook a cluster, randomized, controlled study of sub-cutaneous pegylated IFN $\beta$ -1 $\alpha$   
124 (Plegridy. Biogen Inc, Cambridge MA) administration to determine whether IFN $\beta$ -1 $\alpha$  therapy given to  
125 index cases and household contacts can reduce transmission of SARS-CoV-2.

126

127 **Methods**

128 The Containing Coronavirus Disease-19 (ConCorD-19) trial was a prospective,  
129 cluster, randomized trial of subcutaneous (sc) administration of pegylated IFN $\beta$ -1 $\alpha$  ("IFN $\beta$ -1 $\alpha$  ") versus  
130 standard care (control) <sup>29</sup>. Each household of an index case was randomized to either the IFN $\beta$ -1 $\alpha$   
131 treatment or the standard care control arm. The study was approved by the Institutional Review  
132 Board of the Pontificia Universidad Católica de Chile and was registered with [clinicaltrials.gov](https://clinicaltrials.gov)  
133 (NCT04552379). All participants provided written informed consent.

134

135 *Trial population*

136 Index cases were identified from databases of those with confirmed SARS-CoV-2 from COVID-19  
137 clinics and emergency room visits in Santiago, Chile. Households were contacted by telephone to  
138 determine eligibility prior to enrolment. Individuals aged between 18 and 80 years who met inclusion  
139 and exclusion criteria were deemed as 'eligible' contacts with households only included if there was at  
140 least one eligible contact <sup>29</sup>. Enrolment and the first doses of IFN $\beta$ -1 $\alpha$  - if in the intervention arm- had  
141 to be within 72 hours of the positive identification of SARS-CoV-2 by polymerase chain reaction (PCR)  
142 in index cases. A household was excluded if the index case had been in complete self-quarantine  
143 from other household members during the 48 hours prior to the diagnosis of SARS-CoV-2 infection <sup>29</sup>.  
144 Household characteristics were captured consistent with recommendations of the World Health  
145 Organization for assessing household transmission <sup>30</sup>. All participants implemented quarantine  
146 measures as mandated by local authorities and maintained a daily symptom diary which was collected  
147 and reviewed at each study visit by the study team (see online supplementary material). At any time  
148 during the trial, if a contact participant developed symptoms suggestive of COVID-19, a  
149 nasopharyngeal swab was taken by a member of a mobile health team for virus PCR testing in an

150 accredited SARS-CoV-2 diagnostic laboratory. Index cases were instructed to remain in isolation /  
151 quarantine for 11 days from onset of symptoms or, if asymptomatic, 11 days from the  
152 sample collection date that resulted in the COVID-19 diagnosis. Household contacts remained in  
153 isolation / quarantine for 11 days from date of the sample resulting in the diagnosis of the index case  
154 or of a newly diagnosed household member as per recommendations/rulings by local authorities.

155

### 156 *Intervention*

157 A mobile health team conducted home visits of all participant households on study days 1  
158 (enrolment), 6, 11, 16 and 29. Index cases and eligible household contacts in the IFN $\beta$ -1 $\alpha$  arm  
159 received three subcutaneous doses of IFN $\beta$ -1 $\alpha$  (125 $\mu$ g/0.5ml x 0.5ml) on study days 1, 6 and 11.  
160 Ineligible contacts in the IFN $\beta$ -1 $\alpha$  arm, as well as index cases and all household contacts in the SOC  
161 arm, received standard care. All participating households received information regarding hygiene,  
162 isolation, social distancing and wearing of facemasks as per public health advice at the time of  
163 enrolment. The IFN $\beta$ -1 $\alpha$  injection was given by a trained member of a mobile health team and  
164 participants were recommended to take paracetamol (1000mg, 6 hourly) commencing at the same  
165 time as the IFN $\beta$ -1 $\alpha$  for up to twenty-four hours, in order to mitigate predictable flu-like symptoms<sup>31</sup>.

166

### 167 *Outcomes*

168 The primary outcomes were (i) the proportion of index cases shedding SARS-CoV-2 at study day 11 in  
169 the IFN $\beta$ -1 $\alpha$  compared to control arm and (ii) the proportion of household contacts shedding SARS-  
170 CoV-2 at day 11, in the IFN $\beta$ -1 $\alpha$  compared to the control arm. Secondary and exploratory outcomes  
171 are listed in Supplementary Methods (Supplementary Table 1). Shedding was determined by the  
172 presence of SARS-CoV-2 by PCR in saliva collected on days 1, 6, 11, 16, 21, and 29 (see Supplementary



173 Methods). A SARS-CoV-2 PCR Ct value  $\geq 40$  was considered negative. Viral load was estimated from  
174 the Ct value using a standard algorithm (Supplementary Figure 1

175

#### 176 *Biospecimen collections*

177 The full schedule of biospecimen collection is provided in the supplementary methods  
178 (Supplementary Tables 2 and 3. All consenting, non-eligible household contacts also provided  
179 biospecimens according to the schedule collection for non-eligible household contacts.

180

#### 181 *Adverse events*

182 These were classified in accordance with Good Clinical Practice <sup>32</sup>, as non-serious or serious and as  
183 related or unrelated to the trial medication.

184

#### 185 *Statistical considerations*

186 The study was designed at the start of the pandemic and there were few data to guide sample size  
187 calculations. We therefore planned both frequentist inference and Bayesian analyses based on  
188 assumptions from the available data.

189

190 Households were randomized as individual clusters using a minimization technique (biased coin,  
191  $P=0.7$ ) in order to achieve balance between treatment arms, stratified by the number of people within  
192 the household <sup>33</sup>.

193

194 Sample size calculations assumed,  $\alpha=0.025$  and power 90%, a zero correlation between outcome  
195 measures and that the household-wise, type 1 error rate would be below 0.05 and power above 80%.  
196 The estimated average household size was 4, based on census data <sup>34</sup>.

197

198 Primary outcomes:

199 (i) SARS-CoV-2 shedding at study day 11 by index cases: Data from Wuhan suggested that the  
200 proportion of untreated index cases still shedding virus on study day 11 would be ~85% <sup>35</sup>. Based on a  
201 two tailed Fisher's exact test, a sample size of 278 index cases (139 per arm) would have 90% power  
202 to detect a difference in the proportion of individuals shedding virus at study day 11, if the proportion  
203 in the IFN $\beta$ -1 $\alpha$  arm was 65%.

204

205 (ii) SARS-CoV-2 shedding at study day 11 by household contacts: We estimated the secondary  
206 infection rate (transmission within the household) where there is an untreated index case would  
207 be 28% <sup>36,37</sup>. Based on a stratified Cochran-Mantel-Haenszel test (two-tailed with intra-class  
208 correlation of 0.15), we estimated that a sample of 278 households (834 eligible household contacts)  
209 would have >90% power, at alpha 0.025, to detect an odds ratio of 0.5 for a reduction in transmission  
210 to a treated household contact.

211

212 Based on these assumptions and estimates, we aimed to recruit 310 households (allowing for a 10%  
213 drop-out rate) and 930 eligible household contacts.

214

215 We undertook 3 separate sets of analyses:

216 (A) Standard frequentist analyses based on the primary outcomes as stated in the protocol and  
217 described in the Statistical Analysis Plan (available online) and included intention to treat and per  
218 protocol approaches.

219 (B) Exploratory frequentist analyses based on a modified dataset that accounted for biological  
220 implausibility and effects that might only be associated with active treatment (Figure 1 and  
221 Supplementary Table 1 for further explanations).

222 Both frequentist analyses fitted linear mixed effects models using lme4<sup>38</sup> (see Statistical Analysis  
223 Plan).

224 (C) Exploratory Bayesian analyses using the same dataset as the exploratory frequentist analysis.  
225 Detailed methods are provided in the supplementary methods. Briefly, a generalized linear model  
226 with mixed effects was developed to estimate the probability of infection that is influenced by  
227 explanatory variables for each contact case. A stan\_glmmer with binomial logit function in rstanarm R  
228 package was used<sup>39,40</sup>.

229

230 The frequentist approach allowed us to estimate the effects of IFN $\beta$ -1 $\alpha$  treatment on the risk of an  
231 *individual* becoming infected. Whereas the Bayesian analysis allowed us to determine whether the  
232 ring prophylaxis strategy using IFN $\beta$ -1 $\alpha$  reduces the probability of transmission within the household  
233 of an infected index case.

234

235 With regard to the filtered datasets, we observed, after locking the database, that a number of index  
236 cases had negative PCR results on the day of recruitment despite a previous positive diagnostic PCR  
237 test. In the exploratory analyses we therefore excluded households where the index case was  
238 unlikely to transmit virus because they were not shedding virus on days 1 and day 6 of the study. We

239 also excluded households where an eligible contact was already positive at recruitment and there  
240 were no other eligible negative cases in the household. We refer to the modified dataset as the  
241 population "at risk". We used the population at risk data to better understand the effects of IFN $\beta$ -1 $\alpha$   
242 treatment on transmission of virus within households.

243

244 When undertaking these exploratory analyses, we considered effects during two time periods. Days  
245 1-11 (Period 1) i.e., the treatment and isolation period when eligible contacts in the IFN $\beta$ -1 $\alpha$  arm were  
246 likely to have elevated IFN levels based on the known pharmacokinetics of pegylated IFN $\beta$ -1 $\alpha$  and  
247 days 12-29 (Period 2) the post-treatment and isolation period when biological effects of pegylated  
248 IFN $\beta$ -1 $\alpha$  were likely to be waning in treated individuals. Although samples were not obtained on  
249 days 12-15, we assumed that anyone who became infected during this period would likely still to have  
250 a positive PCR on day 16.

251

## 252 **Results**

253 Recruitment, participation, and completion data are shown in Figure 1. Participant demographic and  
254 basic household characteristics data are shown in Table 1.

255

256 Between December 2020 and May 2021, three-hundred and forty-one households were enrolled and  
257 randomized, of which 137 (IFN $\beta$ -1 $\alpha$  arm) and 151 (control arm) completed the study. Of the 1172  
258 individuals randomized (IFN $\beta$ -1 $\alpha$  arm = 607; Controls = 565), 53 individuals withdrew from the study,  
259 of which 15 were index cases; 35 (14 index cases) in the IFN $\beta$ -1 $\alpha$  arm and 18 (1 index case) in the  
260 control arm. The reasons for withdrawal are summarized in the supplementary results  
261 (Supplementary Table 4). One index case withdrew before being allocated to a treatment arm.

262

263 Eighty-two households where the index case had a negative salivary PCR on Day 1 and 6, or where  
264 there were no eligible contacts who tested negative at recruitment, were excluded from the  
265 exploratory analyses. The remaining households were considered as the 'at risk' population. (Figure  
266 1).

267

268 *(a) Primary analyses*

269 The outcomes for the intention to treat (ITT) and per protocol (PP) frequentist analyses were similar  
270 (Supplementary Results). There was no effect of IFN $\beta$ -1 $\alpha$  treatment on duration of viral shedding in  
271 those treated (index cases or infected contacts) vs. controls (IC-INF: treatment OR = 0.979, 95%CI =  
272 0.647 to 1.479); IC-ITT: treatment OR = 1.106, 95%CI = 0.657 to 1.863); IC-PP: treatment OR = 1.062,  
273 95%CI = 0.622 to 1.810); Figure 2A). The observed reduction in transmission to household contacts  
274 associated with IFNbeta-1alpha by day 11 was not significant (EHC-ITT: treatment OR = 0.582, 95%CI =  
275 0.271 to 1.247; HC: treatment OR = 0.577, 95%CI = 0.287 to 1.160; EHC-PP: treatment OR = 0.589,  
276 95%CI = 0.272to 1.276; Figure 2B). Vaccination status did not affect these outcomes (Supplementary  
277 results).

278 *(b) Exploratory frequentist analysis of 'At Risk Population.'*

279 Of the at risk population, 33/164 (20%) in the IFN $\beta$ -1 $\alpha$  arm became infected by day 29 of the study  
280 compared to 37/142 (26%) in the control arm (relative risk reduction in the IFN arm = 23%). The  
281 majority of the risk reduction occurred during the active treatment phase of the study (days 1 to 11).  
282 Treatment with IFN $\beta$ -1 $\alpha$  was associated with a significant reduction in the odds of a positive saliva  
283 PCR for all household contacts compared to standard of care on Day 11 ( $p$  = 0.033; OR = 0.550, 95% CI

284 = 0.364 to 0.989). The treatment effect was not significant in the second period (days 12-29) was not  
285 significant (OR = 0.968, 95% CI = 0.405 to 2.840) (Figure 2C)

286

287 *(c) Exploratory Bayesian analysis:*

288 Overall, there was a 95% probability of infection reduction within a household by IFN $\beta$ -1 $\alpha$  treatment  
289 and the credible interval for the reduction in transmission probability was in the order of 0.9 to  
290 15.9%. During the active treatment period (days 1-11), there was a significant reduction in the odds of  
291 transmission (Bayesian analysis (OR = 0.32, 95% Credible Interval = 0.11 to 0.83). In contrast, in  
292 Period 2 (day 12-29), the 95% credible interval of *Beta* coefficients for the treatment group includes  
293 zero and therefore treatment was not effective in this period (Figure 2C, Supplementary Figure 2).

294 The effect of IFN $\beta$ -1 $\alpha$  on transmission was independent of household size (Supplementary Figure 3)

295

296 To determine the effect of IFN $\beta$ -1 $\alpha$  treatment on viral shedding in those who became infected, we  
297 examined the viral load trajectories in household contacts who became PCR positive after day 1. We  
298 did not observe any difference in viral load trajectory in those treated with IFN $\beta$ -1 $\alpha$  compared to  
299 controls (Figure 3A). Furthermore, there was no difference in peak viral load between treated  
300 household contacts and controls who became infected (Figure 3B).

301

302 There were fifty-eight serious adverse events in index cases, twenty-seven hospitalizations due to  
303 COVID-19 (25 in the treatment and 32 in the control arm) and was one death in the standard care arm  
304 due to COVID-19 in an individual with significant co-morbidities. Twenty-six household contacts of  
305 index cases were hospitalized, 10 in the treatment arm and 16 in the control arm, the difference was  
306 not statistically significant.

307

## 308 **Discussion**

309 This prospective, household cluster randomized, ring prophylaxis trial demonstrated that IFN $\beta$ -1 $\alpha$   
310 may reduce household transmission of SARS-CoV-19. Pegylated IFN $\beta$ -1 $\alpha$  is an FDA approved therapy  
311 for multiple sclerosis for which the pharmacokinetics and safety profile are well-characterized <sup>41</sup>.  
312 The use of this formulation allowed us to predict the likely duration of activity of the three-dose  
313 regimen in order to cover the period of peak transmissibility of the virus. Using a mobile medical  
314 team to administer doses at home optimized adherence to therapy and allowed reasons for non-  
315 adherence and withdrawal to be accurately documented.

316

317 Although the intention to treat and per protocol analyses failed to demonstrate a significant effect on  
318 primary outcomes, these analyses failed to account for index cases not shedding virus at  
319 randomization nor an absence of eligible contacts within a household. Using biologically plausible  
320 filters to define an at risk population provided a better understanding of the effects of IFN $\beta$ -1 $\alpha$  than  
321 intention to treat or per protocol analyses. These exploratory analyses that took account of the  
322 likelihood that transmission could occur within a household provided a pragmatic assessment of the  
323 effects of IFN $\beta$ -1 $\alpha$  therapy when given to household contacts as prophylaxis.

324

325 The frequentist analysis of the at risk populations indicated that *individuals* treated with IFN were less  
326 likely to become infected than untreated individuals when exposed to virus with a relative risk  
327 reduction of 23%. The Bayesian analysis revealed that the probability was 95% that transmission was  
328 reduced in *households* randomized to IFN $\beta$ -1 $\alpha$  therapy. This effect of IFN $\beta$ -1 $\alpha$  on household  
329 transmission was only significant during the active treatment period. This highlights the physiological

330 importance of IFN $\beta$ -1 $\alpha$  as a sentinel molecule <sup>24</sup> and provides further evidence for post-exposure  
331 prophylaxis with IFN $\beta$ -1 $\alpha$  as an antiviral strategy.

332  
333 To our knowledge, only one previous study assessed ring prophylaxis in COVID-19. Labhardt et al  
334 observed that a combination of lopinavir/ritonavir for 5 days as post-exposure prophylaxis was not  
335 effective at preventing infection in close contacts of index cases <sup>42</sup>.

336  
337 The overall viral load trajectory we observed was very similar to that observed in a laboratory human  
338 challenge experiment using wild-type SARS-CoV-2 virus in healthy volunteers <sup>43</sup>. Treatment with  
339 IFN $\beta$ -1 $\alpha$  had no effect on viral load trajectory; therefore, reduced viral shedding by infected  
340 individuals is unlikely to explain the protective effect on household transmission of IFN $\beta$ -1 $\alpha$  treatment  
341 that we report. Given that treatment affected the probability of transmission only in the active  
342 treatment phase and appears unrelated to viral load, we speculate that the observed effects of IFN $\beta$ -  
343 1 $\alpha$  were direct through protection of the at risk, exposed individual rather than indirectly through  
344 effects on the index case. The ConCoRD-19 biorepository will allow further examination of the  
345 mechanisms of action of IFN $\beta$ -1 $\alpha$  on resistance to infection.

346  
347 The study was undertaken prior to the emergence of the omicron strain of virus (Supplementary  
348 Figure 4). We calculated the sample size based upon known household transmission characteristics of  
349 the alpha strain which was the dominant strain of the virus early in the pandemic. Simple hygiene  
350 measures and quarantine of affected individuals within households could have contributed to lower  
351 rates of transmission than expected. Together with a smaller number of eligible household contacts  
352 than anticipated from census data, these factors may have reduced the power of the study for the



353 primary outcomes. The effect size observed in this study could be greater for variants with higher  
354 transmissibility such as the Omicron strains that are now the dominant worldwide.  
355 Nonetheless, the beneficial biological effect of IFN $\beta$ -1 $\alpha$  treatment was evident in the at risk  
356 population and therefore, post-exposure or ring prophylaxis with IFN $\beta$ -1 $\alpha$  warrants further  
357 investigation, particularly if additional virulent strains of SARS-CoV-2 emerge and for future pandemic  
358 virus preparedness.

359

360 In summary, although intention to treat and per protocol analyses failed to demonstrate significant  
361 effects on primary outcomes, in a biologically defined, at risk population, the relative risk of infection  
362 for an individual treated with IFN $\beta$ -1 $\alpha$  was reduced by 23.0%. Moreover, this is the first study to  
363 demonstrate ring prophylaxis with IFN $\beta$ -1 $\alpha$  significantly reduces the probability of household  
364 transmission of SARS-CoV-2. The effect of IFN $\beta$ -1 $\alpha$  was most obvious during the active phase of  
365 treatment. In situations where there is emergence of a highly pathogenic and transmissible mutant  
366 strain of SARS-CoV-2 despite high vaccination rates, or when there is a new viral pandemic, IFN $\beta$ -1 $\alpha$   
367 ring prophylaxis could be considered to reduce transmission in households or amongst critical  
368 workers and vulnerable communities. Ring prophylaxis with therapies that can interrupt transmission  
369 appears to be an effective strategy for highly contagious respiratory viruses.

370 **Funding.**

371 Biogen PTY Ltd. Supply of interferon as "Plegridy".

372 The study was substantially funded by BHP Holdings Pty Ltd

373

374

375

376 **Authorship**

377 Authors Castro-Rodriguez; Fish; Kollmann; Iturriaga, Karpievitch and Shannon contributed equally to  
378 the conduct of the study and manuscript preparation as first authors. Authors Tebbutt, Diego García-  
379 Huidobro, Perret, Borzutsky and Stick contributed equally to the conduct of the study and manuscript  
380 preparation as senior authors.

381

382 **Acknowledgements**

383 Matthew Cooper (Telethon Kids Institute). Advice regarding protocol and establishment of  
384 randomization schedule. Alexia Foti (Telethon Kids Institute). Collating, reviewing, and editing  
385 documents. Zsuzsanna Hollander (PROOF Centre, Vancouver). Statistical advice and statistical analysis  
386 plan review. Nat Eiffler (Telethon Kids Institute). Project management, protocol development, data  
387 management. Jessica Meyer (University of Rochester). Assisting collation and formatting of tables and  
388 figures.

389

## 390 **References**

- 391 1. Alizon S, Haim-Boukobza S, Foulongne V, et al. Rapid spread of the SARS-CoV-2 Delta variant in  
392 some French regions, June 2021. *Euro Surveill* 2021;26(28). DOI: 10.2807/1560-  
393 7917.ES.2021.26.28.2100573.
- 394 2. Mishra S, Mindermann S, Sharma M, et al. Changing composition of SARS-CoV-2 lineages and rise  
395 of Delta variant in England. *EClinicalMedicine* 2021;39:101064. DOI: 10.1016/j.eclinm.2021.101064.
- 396 3. Twohig K, Nyberg T, Zaidi A, et al. Hospital admission and emergency care attendance risk for  
397 SARS-CoV-2 delta (B.1.617.2) compared with alpha (B.1.1.7) variants of concern: a cohort study.  
398 *Lancet Infectious Diseases* 2021. DOI: 10.1016/S1473-3099(21)00475-8.
- 399 4. Winger A, Caspari T. The Spike of Concern-The Novel Variants of SARS-CoV-2. *Viruses* 2021;13(6).  
400 DOI: 10.3390/v13061002.
- 401 5. Lyngse FP, Mortensen LH, Denwood MJ, et al. SARS-CoV-2 Omicron VOC Transmission in Danish  
402 Households. *medRxiv* 2021.
- 403 6. Nyberg T, Ferguson NM, Nash SG, et al. Comparative analysis of the risks of hospitalisation and  
404 death associated with SARS-CoV-2 omicron (B.1.1.529) and delta (B.1.617.2) variants in England: a  
405 cohort study. *Lancet* 2022;399(10332):1303-1312. DOI: 10.1016/S0140-6736(22)00462-7.
- 406 7. Le Rutte E, Shattock A, Chitnis N, Kelly. SL, Penny M. Assessing impact of Omicron on SARS-CoV-2  
407 dynamics and public health burden. *medRxiv*. Online server: Cold Spring Harbor Laboratory; 2021.
- 408 8. Centers for Disease Control and Prevention. Implementation of Mitigation Strategies for  
409 Communities with Local COVID-19 Transmission. CDC. May 23 2021.
- 410 9. Milne GJ, Xie S, Poklepovich D, O'Halloran D, Yap M, Whyatt D. A modelling analysis of the  
411 effectiveness of second wave COVID-19 response strategies in Australia. *Sci Rep* 2021;11(1):11958.  
412 DOI: 10.1038/s41598-021-91418-6.

- 413 10. National Incident Room Surveillance Team. COVID-19 Australia: Epidemiology Report 38  
414 Reporting period ending 28 March 2021. *Commun Dis Intell* (2018) 2021;45. DOI:  
415 10.33321/cdi.2021.45.19.
- 416 11. Houvessou GM, Souza TP, Silveira MFD. Lockdown-type containment measures for COVID-19  
417 prevention and control: a descriptive ecological study with data from South Africa, Germany, Brazil,  
418 Spain, United States, Italy and New Zealand, February - August 2020. *Epidemiol Serv Saude*  
419 2021;30(1):e2020513. DOI: 10.1590/S1679-49742021000100025.
- 420 12. Conway SR, Lazarski CA, Field NE, et al. SARS-CoV-2-Specific T Cell Responses Are Stronger in  
421 Children With Multisystem Inflammatory Syndrome Compared to Children With Uncomplicated SARS-  
422 CoV-2 Infection. *Front Immunol* 2021;12:793197. DOI: 10.3389/fimmu.2021.793197.
- 423 13. Cutler DM, Summers LH. The COVID-19 Pandemic and the \$16 Trillion Virus. *JAMA*  
424 2020;324(15):1495-1496. DOI: 10.1001/jama.2020.19759.
- 425 14. Verschuur J, Koks EE, Hall JW. Global economic impacts of COVID-19 lockdown measures stand  
426 out in high-frequency shipping data. *PLoS One* 2021;16(4):e0248818. DOI:  
427 10.1371/journal.pone.0248818.
- 428 15. Chemen S, Gopalla YN. Lived experiences of older adults living in the community during the  
429 COVID-19 lockdown - The case of mauritius. *J Aging Stud* 2021;57:100932. DOI:  
430 10.1016/j.jaging.2021.100932.
- 431 16. Mamun MA. Suicide and Suicidal Behaviors in the Context of COVID-19 Pandemic in Bangladesh:  
432 A Systematic Review. *Psychol Res Behav Manag* 2021;14:695-704. DOI: 10.2147/PRBM.S315760.
- 433 17. Callaway E. Beyond Omicron: what's next for COVID's viral evolution. *Nature* 2021;600(7888):204-  
434 207. DOI: 10.1038/d41586-021-03619-8.

- 435 18. Rahmani H, Davoudi-Monfared E, Nourian A, et al. Interferon  $\beta$ -1b in treatment of severe COVID-  
436 19: A randomized clinical trial. *Int Immunopharmacol* 2020;88:106903. (In eng). DOI:  
437 10.1016/j.intimp.2020.106903.
- 438 19. Alavi Darazam I, Shokouhi S, Pourhoseingholi MA, et al. Role of interferon therapy in severe  
439 COVID-19: the COVIFERON randomized controlled trial. *Sci Rep* 2021;11(1):8059. (In eng). DOI:  
440 10.1038/s41598-021-86859-y.
- 441 20. Davoudi-Monfared E, Rahmani H, Khalili H, et al. A Randomized Clinical Trial of the Efficacy and  
442 Safety of Interferon  $\beta$ -1a in Treatment of Severe COVID-19. *Antimicrob Agents Chemother* 2020;64(9)  
443 (In eng). DOI: 10.1128/aac.01061-20.
- 444 21. Feld JJ, Kandel C, Biondi MJ, et al. Peginterferon lambda for the treatment of outpatients with  
445 COVID-19: a phase 2, placebo-controlled randomised trial. *Lancet Respir Med* 2021;9(5):498-510. (In  
446 eng). DOI: 10.1016/s2213-2600(20)30566-x.
- 447 22. Meng Z, Wang T, Chen L, et al. The Effect of Recombinant Human Interferon Alpha Nasal Drops to  
448 Prevent COVID-19 Pneumonia for Medical Staff in an Epidemic Area. *Curr Top Med Chem*  
449 2021;21(10):920-927. (In eng). DOI: 10.2174/1568026621666210429083050.
- 450 23. National Institutes of Health. Covid-19 Treatment Guidelines. In: Health NIH, ed.: United States  
451 Government; 2021.
- 452 24. Lee AJ, Ashkar AA. The Dual Nature of Type I and Type II Interferons. *Front Immunol* 2018;9:2061.  
453 DOI: 10.3389/fimmu.2018.02061.
- 454 25. Mazewski C, Perez RE, Fish EN, Plataniias LC. Type I Interferon (IFN)-Regulated Activation of  
455 Canonical and Non-Canonical Signaling Pathways. *Front Immunol* 2020;11:606456. DOI:  
456 10.3389/fimmu.2020.606456.

- 457 26. Wang BX, Fish EN. Global virus outbreaks: Interferons as 1st responders. *Semin Immunol*  
458 2019;43:101300. DOI: 10.1016/j.smim.2019.101300.
- 459 27. World Health Organization. Informal consultation on the role of therapeutics in COVID-19  
460 prophylaxis and post-exposure prophylaxis. . Worl Health Organization.
- 461 28. Gentile I, Maraolo AE, Piscitelli P, Colao A. COVID-19: Time for Post-Exposure Prophylaxis? *Int J*  
462 *Environ Res Public Health* 2020;17(11):3997. (In eng). DOI: 10.3390/ijerph17113997.
- 463 29. Iturriaga C, Eiffler N, Aniba R, et al. A cluster randomized trial of interferon ss-1a for the reduction  
464 of transmission of SARS-Cov-2: protocol for the Containing Coronavirus Disease 19 trial (ConCorD-19).  
465 *BMC Infect Dis* 2021;21(1):814. DOI: 10.1186/s12879-021-06519-4.
- 466 30. World Health Organization. Household transmission investigation protocol for 2019-novel  
467 coronavirus (COVID-19) infection. Epidemiological protocol. Geneva: World Health Organization,  
468 February 28th 2020 2020. (WHO/2019-nCoV/HHtransmission/2020.4)  
469 ([https://www.who.int/publications/i/item/household-transmission-investigation-protocol-for-2019-](https://www.who.int/publications/i/item/household-transmission-investigation-protocol-for-2019-novel-coronavirus-(2019-ncov)-infection)  
470 [novel-coronavirus-\(2019-ncov\)-infection](https://www.who.int/publications/i/item/household-transmission-investigation-protocol-for-2019-novel-coronavirus-(2019-ncov)-infection)).
- 471 31. Reess J, Haas J, Gabriel K, Fuhlrott A, Fiola M. Both paracetamol and ibuprofen are equally  
472 effective in managing flu-like symptoms in relapsing-remitting multiple sclerosis patients during  
473 interferon beta-1a (AVONEX) therapy. *Mult Scler* 2002;8(1):15-8. DOI: 10.1191/1352458502ms771sr.
- 474 32. National Health and Medical Research Council. Guidance: Safety monitoring and reporting in  
475 clinical trials involving therapeutic goods. Canberra: National Health and Medical Research Council;  
476 2016.
- 477 33. Hofmeijer J, Anema PC, van der Tweel I. New algorithm for treatment allocation reduced  
478 selection bias and loss of power in small trials. *J Clin Epidemiol* 2008;61(2):119-24. DOI:  
479 10.1016/j.jclinepi.2007.04.002.

- 480 34. National Institute of Statistics. Chile Population and Housing Census 2017. Santiago, Chile:  
481 National Institute of Statistics (Chile), 2021. ([http://ghdx.healthdata.org/record/chile-population-and-](http://ghdx.healthdata.org/record/chile-population-and-housing-census-2017)  
482 [housing-census-2017](http://ghdx.healthdata.org/record/chile-population-and-housing-census-2017)).
- 483 35. World Health Organisation. Situation report - 50. Coronavirus disease 2019 (COVID-19) 50. World  
484 Health Organisation, 2020. ([https://www.who.int/emergencies/diseases/novel-coronavirus-](https://www.who.int/emergencies/diseases/novel-coronavirus-2019/situation-reports)  
485 [2019/situation-reports](https://www.who.int/emergencies/diseases/novel-coronavirus-2019/situation-reports)).
- 486 36. Yi B, Fen G, Cao D, et al. Epidemiological and clinical characteristics of 214 families with COVID-19  
487 in Wuhan, China. Int J Infect Dis 2021. DOI: 10.1016/j.ijid.2021.02.021.
- 488 37. Curmei M, Ilyas A, Evans O, Steinhardt J. Constructing and adjusting estimates for household  
489 transmission of SARS-CoV-2 from prior studies, widespread-testing and contact-tracing data. Int J  
490 Epidemiol 2021;50(5):1444-1457. DOI: 10.1093/ije/dyab108.
- 491 38. Bates DM, M.; Bolker, B.; Walker, S. Fitting linear mixed-effects models using lme4. Journal of  
492 Statistical Software 2015;67(1):1-48. DOI: doi:10.18637/jss.v067.i01.
- 493 39. Goodrich B, Gabry J, Ali I, S. B. Bayesian applied regression modeling via Stan. R package version  
494 2.21.1. rstanarm 2020 (<https://mc-stan.org/rstanarm>).
- 495 40. Brilleman SL, Crowther MJ, Moreno-Betancur M, Buros Novik J, Wolfe R. Joint longitudinal and  
496 time-to-event models via Stan. StanCon 2018. 10-12 Jan 2018. Pacific Grove C, USA.  
497 [https://github.com/stan-dev/stancon\\_talks/](https://github.com/stan-dev/stancon_talks/). Joint longitudinal and time-to-event models via Stan. .  
498 StanCon 2018. Pacific Grove, CA, USA2018.
- 499 41. Hu X, Seddighzadeh A, Stecher S, et al. Pharmacokinetics, pharmacodynamics, and safety of  
500 peginterferon beta-1a in subjects with normal or impaired renal function. J Clin Pharmacol  
501 2015;55(2):179-88. DOI: 10.1002/jcph.390.

- 502 42. Labhardt ND, Smit M, Petignat I, et al. Post-exposure Lopinavir-Ritonavir Prophylaxis versus  
503 Surveillance for Individuals Exposed to SARS-CoV-2: The COPEP Pragmatic Open-Label, Cluster  
504 Randomized Trial. *EClinicalMedicine* 2021;42:101188. DOI: 10.1016/j.eclinm.2021.101188.
- 505 43. Ben K, Alex M, Mariya K, et al. *Nature Portfolio* 2022. DOI: 10.21203/rs.3.rs-1121993/v1.
- 506
- 507



|                                        | Full study population |                  | At risk population |                  |
|----------------------------------------|-----------------------|------------------|--------------------|------------------|
|                                        | SOC<br>(n = 565)      | IFN<br>(n = 607) | SOC<br>(n = 246)   | IFN<br>(n = 293) |
| <b>Age (years)</b>                     |                       |                  |                    |                  |
| Mean (SD)                              | 35.0 (19.4)           | 33.2 (18.7)      | 29.2 (21.0)        | 29.0 (20.0)      |
| <b>Sex</b>                             |                       |                  |                    |                  |
| Female, n (%)                          | 294 (52.0%)           | 323 (53.2%)      | 133 (54.1%)        | 171 (58.4%)      |
| Male, n (%)                            | 271 (48.0%)           | 284 (46.8%)      | 113 (45.9%)        | 122 (41.6%)      |
| <b>Household occupants</b>             |                       |                  |                    |                  |
| Mean (SD)                              | 4.10 (1.31)           | 4.51 (2.02)      | 4.28 (1.30)        | 4.86 (2.24)      |
| <b>Fully vaccinated for SARS-CoV-2</b> |                       |                  |                    |                  |
| No, n (%)                              | 380 (67.3%)           | 438 (72.2%)      | 167 (67.9%)        | 217 (74.1%)      |
| Yes, n (%)                             | 103 (20.3%)           | 169 (27.8%)      | 79 (32.1%)         | 76 (25.9%)       |
| <b>Cancer</b>                          |                       |                  |                    |                  |
| No, n (%)                              | 559 (98.9%)           | 598 (98.5%)      | 245 (99.6%)        | 290 (99.0%)      |
| Yes, n (%)                             | 5 (0.9%)              | 9 (1.5%)         | 0 (0%)             | 3 (1.0%)         |
| Missing, n (%)                         | 1 (0.2%)              | 0 (0%)           | 1 (0.4%)           | 0 (0%)           |
| <b>Diabetes</b>                        |                       |                  |                    |                  |
| No, n (%)                              | 542 (95.9%)           | 583 (96.0%)      | 238 (96.7%)        | 285 (97.3%)      |
| Yes, n (%)                             | 22 (3.9%)             | 24 (4.0%)        | 7 (2.8%)           | 8 (2.7%)         |
| Missing, n (%)                         | 1 (0.2%)              | 0 (0%)           | 1 (0.4%)           | 0 (0%)           |
| <b>Heart disease</b>                   |                       |                  |                    |                  |
| No, n (%)                              | 533 (94.3%)           | 578 (95.2%)      | 236 (95.9%)        | 281 (95.9%)      |
| Yes, n (%)                             | 31 (5.5%)             | 29 (4.8%)        | 9 (3.7%)           | 12 (4.1%)        |
| Missing, n (%)                         | 1 (0.2%)              | 0 (0%)           | 1 (0.4%)           | 0 (0%)           |
| <b>Asthma</b>                          |                       |                  |                    |                  |
| No, n (%)                              | 524 (92.7%)           | 581 (95.7%)      | 230 (93.5%)        | 282 (96.2%)      |
| Yes, n (%)                             | 40 (7.1%)             | 26 (4.3%)        | 15 (6.1%)          | 11 (3.8%)        |
| Missing, n (%)                         | 1 (0.2%)              | 0 (0%)           | 1 (0.4%)           | 0 (0%)           |
| <b>Chronic lung disease</b>            |                       |                  |                    |                  |
| No, n (%)                              | 564 (99.8%)           | 606 (99.8%)      | 245 (99.6%)        | 292 (99.7%)      |
| Yes, n (%)                             | 0 (0%)                | 1 (0.2%)         | 0 (0%)             | 1 (0.3%)         |
| Missing, n (%)                         | 1 (0.2%)              | 0 (0%)           | 1 (0.4%)           | 0 (0%)           |
| <b>Chronic kidney disease</b>          |                       |                  |                    |                  |
| No, n (%)                              | 564 (99.8%)           | 604 (99.5%)      | 245 (99.6%)        | 292 (99.7%)      |
| Yes, n (%)                             | 0 (0%)                | 3 (0.5%)         | 0 (0%)             | 1 (0.3%)         |
| Missing, n (%)                         | 1 (0.2%)              | 0 (0%)           | 1 (0.4%)           | 0 (0%)           |
| <b>Chronic neurological disease</b>    |                       |                  |                    |                  |
| No, n (%)                              | 562 (99.5%)           | 602 (99.2%)      | 245 (99.6%)        | 290 (99.0%)      |
| Yes, n (%)                             | 2 (0.4%)              | 5 (0.8%)         | 0 (0%)             | 3 (1.0%)         |
| Missing, n (%)                         | 1 (0.2%)              | 0 (0%)           | 1 (0.4%)           | 0 (0%)           |
| <b>Smoker</b>                          |                       |                  |                    |                  |
| No, n (%)                              | 502 (88.8%)           | 519 (85.5%)      | 227 (92.3%)        | 255 (87.0%)      |
| Yes, n (%)                             | 63 (11.2%)            | 88 (14.5%)       | 19 (7.7%)          | 38 (13.0%)       |
| Missing, n (%)                         | 0 (0%)                | 0 (0%)           | 0 (0%)             | 0 (0%)           |

508 **Table 1: Full study population demographics at baseline, and at risk population demographics at**  
509 **baseline.**

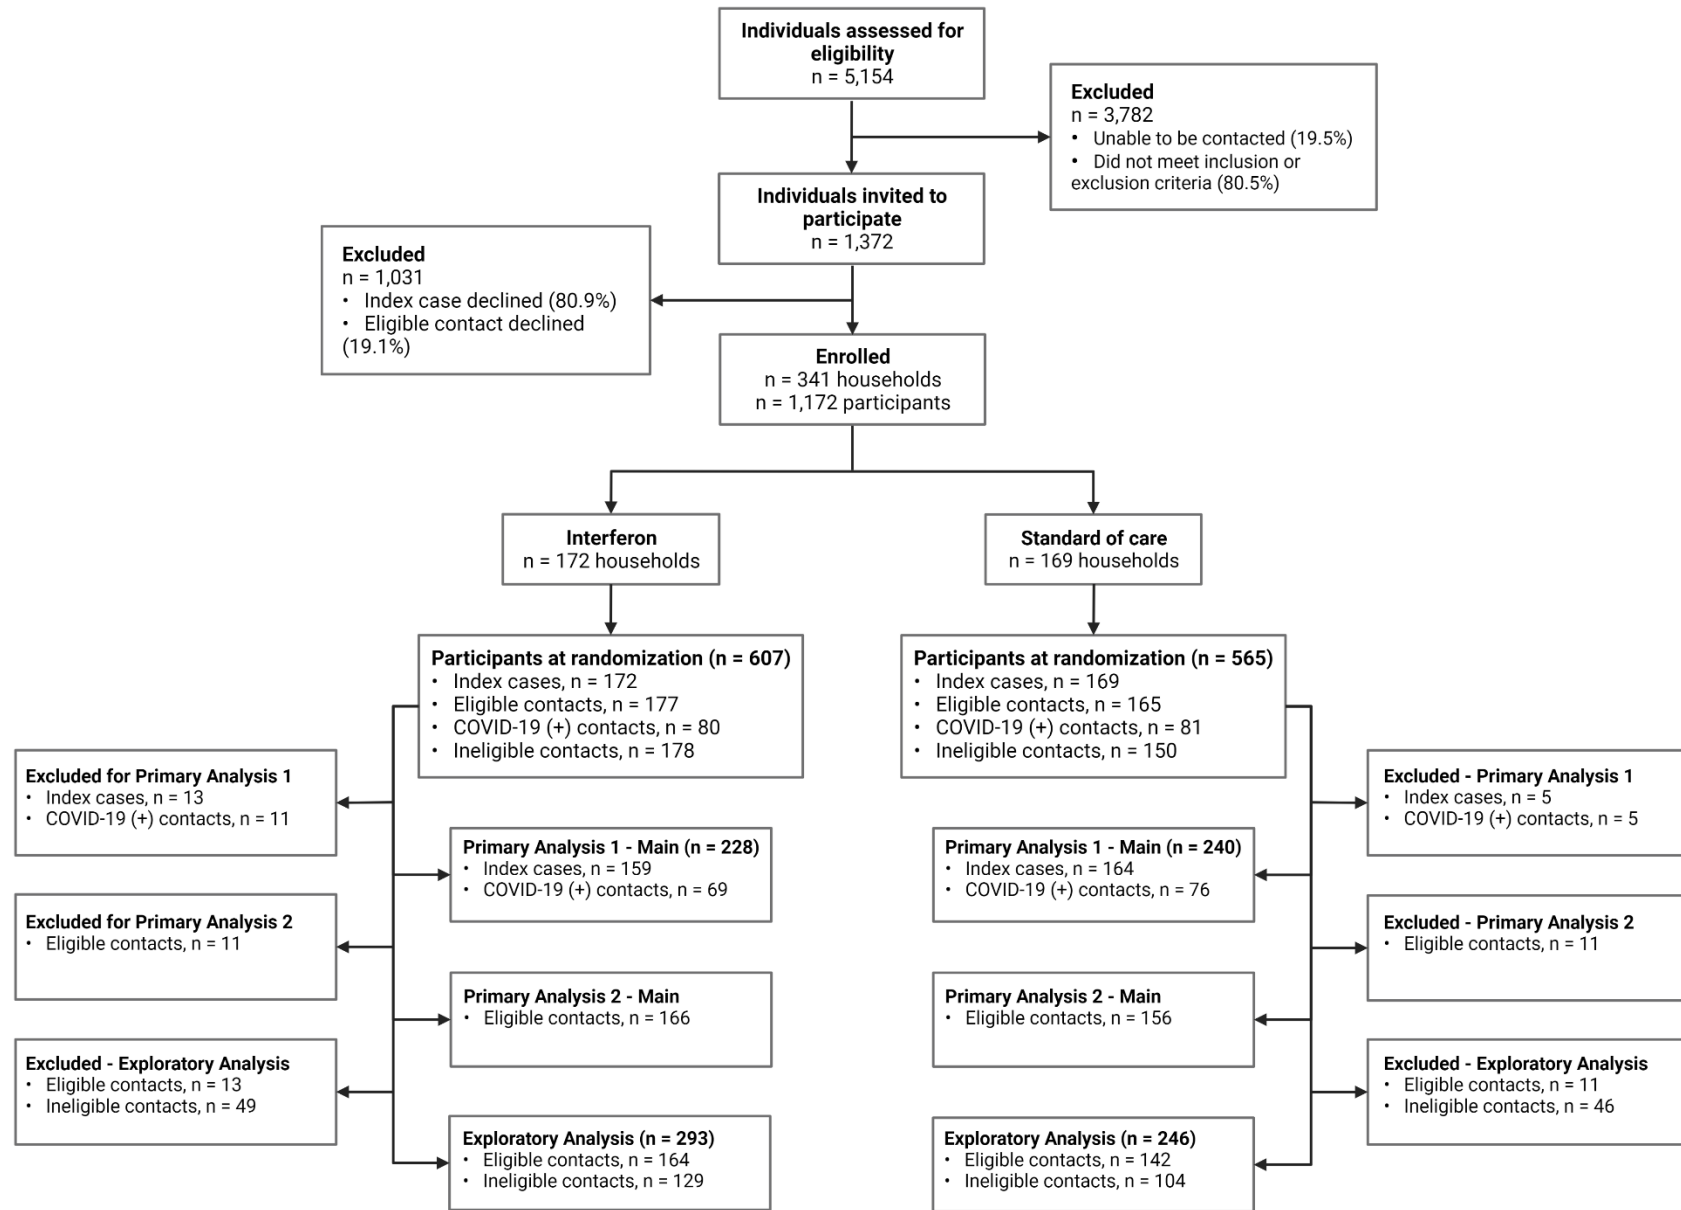

Figure 1: CONSORT diagram describing participant screening, enrolment, randomisation, and analysis.

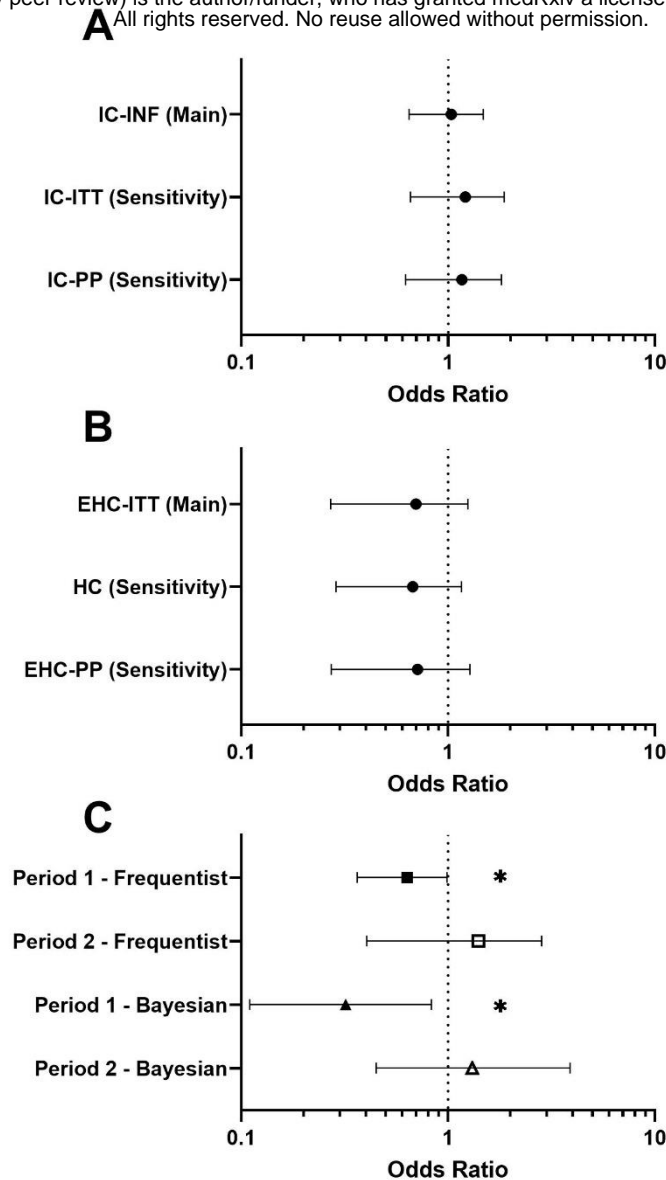

1 **Figure 2: Forrest plots describing primary and exploratory study outcomes. (A)** odds ratios for  
2 index case populations in Primary Analysis 1 and associated sensitivity analyses, to compare the  
3 probability of being SARS-CoV-2 negative vs positive on study day 11 in either treatment or  
4 standard of care arms. **(B)** odds ratios for household contact populations in Primary Analysis 2 and  
5 associated sensitivity analyses, to compare the probability of household contacts being SARS-CoV-  
6 2 negative vs positive on study day 11 in either treatment of standard of care arms. **(C)** odds ratios  
7 for the exploratory frequentist and Bayesian analysis, to determine if IFN is associated with a  
8 reduction in the number of positive COVID-19 tests in household contacts across study period 1  
9 (days 1-11) and study period 2 (days 12-29). Treatment with IFN is associated with a significant  
10 reduction in the odds of a positive COVID-19 test for all household contacts compared to standard  
11 of care; frequentist analysis ( $p = 0.033$ ; OR = 0.550, 95% CI = 0.364 to 0.989), Bayesian analysis (OR  
12 = 0.32, 95% CrI = 0.11 to 0.83). IC-INF = Infected case population (main analysis), IC-ITT = Index  
13 case – intention to treat population (sensitivity analysis 7.1.3.2), IC-PP = Index case – per protocol  
14 population (sensitivity analysis 7.1.3.3). EHC-ITT = Treatment-eligible household contact –  
15 intention to treat population (main analysis), HC = Household contact (eligible + non-eligible  
16 contacts) population (sensitivity analysis 7.2.3.2), EHC-PP = Treatment-eligible household contact  
17 = per protocol population (sensitivity analysis 7.2.3.3). \*  $p < 0.05$ .

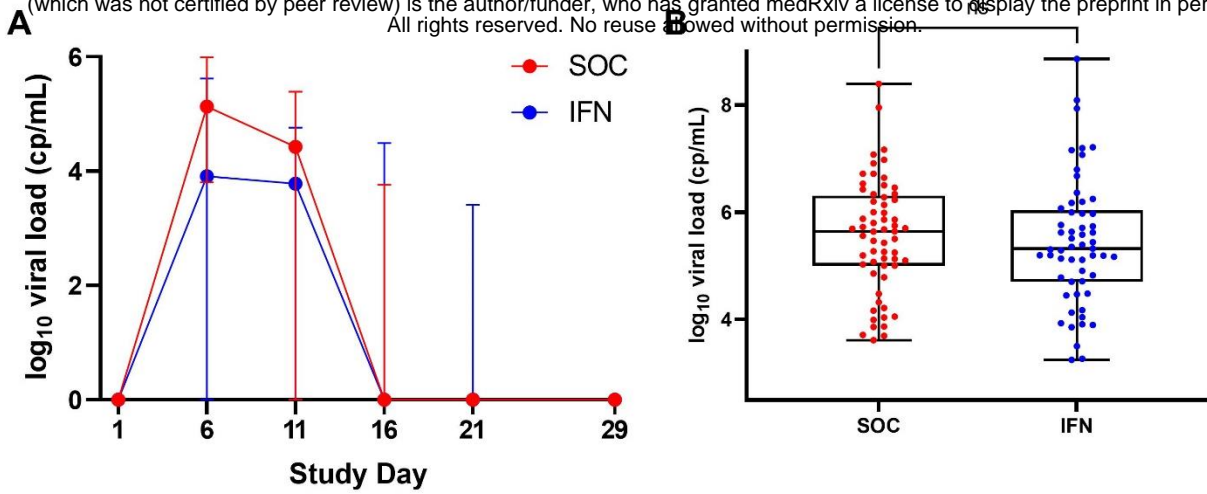

1 **Figure 3: Log<sub>10</sub> viral load in study participants who test positive for COVID-19 after visit 1. (A)** No  
2 significant difference in median viral load at each study visit between SOC and IFN arms. **(B)** No  
3 significant difference in peak viral load between SOC and IFN arms. SOC = standard of care arm,  
4 IFN = interferon arm, cp/mL = copies/mL. n = 57 (IFN) & n = 61 (SOC) participants per group.  
5  
6

## Supplementary Materials

**Table of Contents**

List of Study Investigators ..... 3

Supplementary Methods ..... 5

    Real-time Quantitative Polymerase Chain Reaction (RT-qPCR) for SARS-CoV-2..... 5

    Viral load calculation..... 5

    Populations used for analyses ..... 5

    Bayesian statistical analysis..... 5

    Bayesian model..... 6

    Computation of difference in probability of infection in IFN vs SOC arms ..... 6

Supplementary Results..... 7

    Bayesian analysis of infection reduction ..... 7

Supplementary Figures ..... 8

    Supplementary Figure 1: Standard curve for calculation of SARS-CoV-2 viral load ..... 8

    Supplementary Figure 2: Distribution of the difference in probability of infection between SOC and IFN arms by household size..... 9

    Supplementary Figure 3: Distribution of the difference in probability of infection between SOC and IFN arms. .... 9

    Supplementary Figure 4: COVID-19 variants detected in Santiago, Chile during study recruitment..... 10

Supplementary Tables..... 11

    Supplementary Table 1: Primary, secondary, and exploratory outcomes for the Containing Coronavirus Disease-19 clinical trial..... 12

    Supplementary Table 2: Schedule of laboratory assessments for index cases and treatment eligible household contacts..... 13

    Supplementary Table 3: Schedule of laboratory assessments for treatment ineligible household contacts. .... 14

    Supplementary Table 4: Study withdrawal reasons by treatment arm. .... 15

    Supplementary Table 5: Reasons for exclusion from study participation during screening and reasons for declined participation following invitation to participate in ConCorD-19. .... 16

    Supplementary Table 6: Study populations used for analysis, and reasons for exclusion from analysis. .... 17

    Supplementary Table 7: Bayesian estimated beta coefficients and odds ratio for treatment with IFN, with average values and 95% credible intervals. .... 18

    Supplementary Table 8: Difference in probability of infection in each study period irrespective of household size..... 18

    Supplementary Table 9: Difference in probability of infection in each study period, stratifying by household size..... 18

    Supplementary Table 10: Number of contacts at each household size. .... 19

Supplementary References..... 20

Supplementary Appendices..... 21

## List of Study Investigators

### **Jose A. Castro-Rodriguez**

Department of Pediatric Pulmonology, School of Medicine, Pontificia Universidad Católica de Chile, Santiago, Chile

### **Eleanor N. Fish**

Department of Immunology, University of Toronto, Toronto, Canada  
Toronto General Hospital Research Institute, University Health Network, Toronto, Canada

### **Tobias Kollman**

Telethon Kids Institute, University of Western Australia, Nedlands, Australia

### **Carolina Iturriaga**

Department of Pediatric Infectious Diseases and Immunology, School of Medicine, Pontificia Universidad Católica de Chile, Santiago, Chile  
Millennium Institute on Immunology and Immunotherapy, School of Medicine, Pontificia Universidad Católica de Chile, Santiago, Chile

### **Yuliya Karpievitch**

Wal-yan Respiratory Research Centre, Telethon Kids Institute, University of Western Australia, Nedlands, Australia  
School of Biomedical Sciences, University of Western Australia, Nedlands, Australia

### **Casey Shannon**

Prevention of Organ Failure (PROOF) Centre of Excellence, Vancouver, Canada  
Centre for Heart Lung Innovation, Providence Health, St Paul's Hospital, Vancouver, Canada

### **Virginia Chen**

Prevention of Organ Failure (PROOF) Centre of Excellence, Vancouver, Canada  
Centre for Heart Lung Innovation, Providence Health, St Paul's Hospital, Vancouver, Canada

### **Robert Balshaw**

Prevention of Organ Failure (PROOF) Centre of Excellence, Vancouver, Canada  
Centre for Heart Lung Innovation, Providence Health, St Paul's Hospital, Vancouver, Canada

### **Samuel T. Montgomery**

Wal-yan Respiratory Research Centre, Telethon Kids Institute, University of Western Australia, Nedlands, Australia  
School of Population Health, Curtin University, Bentley, Australia

### **Joseph Ho**

Wal-yan Respiratory Research Centre, Telethon Kids Institute, University of Western Australia, Nedlands, Australia

### **Rym Ben Othman**

Telethon Kids Institute, University of Western Australia, Nedlands, Australia

### **Radhouana Aniba**

Telethon Kids Institute, University of Western Australia, Nedlands, Australia

### **Francisca Gidi-Yunge**

School of Dentistry, Faculty of Medicine, Pontificia Universidad Católica de Chile, Santiago, Chile

**Lucy Hartnell**

Telethon Kids Institute, University of Western Australia, Nedlands, Australia

**Guillermo Pérez-Mateluna**

Department of Pediatric Infectious Diseases and Immunology, School of Medicine, Pontificia Universidad Católica De Chile, Santiago, Chile

**Marcela Urzúa**

Department of Pediatric Infectious Diseases and Immunology, School of Medicine, Pontificia Universidad Católica De Chile, Santiago, Chile

**Scott Tebbit**

Prevention of Organ Failure (PROOF) Centre of Excellence, Vancouver, Canada  
Centre for Heart Lung Innovation, Providence Health, St Paul's Hospital, Vancouver, Canada

**Diego García-Huidobro**

Department of Family Medicine, School of Medicine, Pontificia Universidad Católica de Chile, Santiago, Chile

Department of Family Medicine and Community Health, University of Minnesota, United States of America

**Cecilia Perret**

Department of Pediatric Infectious Diseases and Immunology, School of Medicine, Pontificia Universidad Católica de Chile, Santiago, Chile

**Arturo Borzutzky**

Department of Pediatric Infectious Diseases and Immunology, School of Medicine, Pontificia Universidad Católica de Chile, Santiago, Chile

Millennium Institute on Immunology and Immunotherapy, School of Medicine, Pontificia Universidad Católica de Chile, Santiago, Chile

**Stephen M. Stick**

Wal-yan Respiratory Research Centre, Telethon Kids Institute, University of Western Australia, Nedlands, Australia

Perth Children's Hospital, Nedlands, Australia



### **Real-time Quantitative Polymerase Chain Reaction (RT-qPCR) for SARS-CoV-2**

RNA extraction and RT-qPCR for SARS-CoV-2 detection was performed at the Infectiology and Molecular Virology Laboratory, Red Salud UC Christus, Santiago, Chile. RNA was extracted in parallel from saliva using the MagBind RNA extraction kit (#GN7101907, Maccura Biotechnology, Rockville, MD, USA) with the Auto-Pure 32A Nucleic Purification System (Maccura Biotechnology, Rockville, MD, USA), and using the RNA/DNA Purification Magnetic Bead Kit (#DA0630, DaAnGene, Guangzhou, CN) with the Smart32 Nucleic Acid Extraction Instrument (DaAnGene, Guangzhou, CN) according to manufacturer specifications. Real-time PCR amplification was performed using the LightMix Modular Wuhan CoV RdRP-gene kit (#53-0777-96, TIB MolBiol, Roche, Berlin, DE) targeting the RNA-dependent RNA polymerase (RdRP) gene, targeting SARS-COV-2, but not other SARS-like viruses (CoVNL63, CoV229E, HKE, OC43, MERS), with a positive control containing three separate diagnostic targets (E gene, N gene, RdRP). The reverse transcription and PCR processes occur in a single step in a real-time thermocycler (Lightcycler 480 II, Roche, Berlin, DE) with an analytical sensitivity of 10.6 copies per reaction. A cycle threshold (Ct) value of  $\leq 37$  was considered positive for SARS-CoV-2.

### **Viral load calculation**

The viral load of SARS-CoV-2 detected in saliva was calculated using a standard curve. A commercial SARS-CoV-2 standard (#COV019, Exact Diagnostics, Fort Worth, TX, USA) at a concentration of 200,000 copies per mL (cp/mL) was extracted in triplicate using the RNA/DNA Purification Magnetic Bead Kit (#DA0630, DaAnGene, Guangzhou, CN) with the Smart32 Nucleic Acid Extraction Instrument (DaAnGene, Guangzhou, CN) according to manufacturer specifications. Following extraction, serial dilutions (1:10; 200,000cp/mL to 20cp/mL & 1:5; 200,000cp/mL to 64cp/mL) were used in triplicate for reverse transcription and RT-qPCR using the LightMix Modular Wuhan CoV RdRP-gene kit (#53-0777-96, TIB MolBiol, Roche, Berlin, DE) with the Lightcycler 480 II thermocycler (Roche, Berlin, DE), resulting in 9 replicates at each concentration. SARS-CoV-2 was detectable in all nine replicates at 200,000cp/mL, 40,000cp/mL, 20,000cp/mL, 8,000cp/mL, 2000cp/mL, and 1,600cp/mL, and a standard curve was generated using the mean Ct values for these concentrations (Supplementary Figure 1) to calculate SARS-CoV-2 viral load in samples of unknown titre, resulting in a lower limit of quantification of 1,600cp/mL.

### **Populations used for analyses**

Participants were excluded for analysis as outlined in the statistical analysis plan, or as outlined in the exploratory analysis (Supplementary Appendix B). Total households and participants excluded and used in each population are described in Supplementary Table 6. Briefly, participants were excluded from the populations used in the primary analyses (IC-INF, IC-ITT, EHC-ITT, HC) if the study visit was not performed, or was performed outside the  $\pm 1$  day window either side of the scheduled visit date (Statistical Analysis Plan 6.5). Participants who didn't complete the full course of the treatment were excluded from the Per Protocol populations used in the primary analyses (IC-PP, EHC-PP). In the exploratory analysis, whole households were excluded if the index case was SARS-CoV-2 negative via salivary PCR at study days 1 & 6, and if there were no SARS-CoV-2 negative eligible or ineligible contacts in the household at study day 1. Participants were then excluded from the exploratory analysis if they were SARS-CoV-2 positive via salivary PCR at study day 1. Participants were further excluded from the Bayesian analysis where household size was greater than 7, as these household sizes were unable to be modelled using Bayesian modelling.

### **Bayesian statistical analysis**

Bayesian analysis was included in the original statistical analysis plan. The goal was to test the null hypothesis that treatment of household contacts with IFN $\beta$ -1 $\alpha$  does not reduce the probability of transmission from an infected index case to household contacts. As outlined in the analysis plan, we used data to develop a data generating process governed by probabilities that a household contact of an index case would test positive to COVID-19, and non-informative prior was used.

**Bayesian model**  
A generalized linear model with mixed effects was developed to estimate the probability of infection for each contact. A `stan_glm` with binomial logit function from the `rstanarm` package (1) was run using R (version 4.1.1) to obtain Beta coefficients for 4,000 simulated samples to estimate the probability of infection using the following model:

$$p_{cr} \sim (1 | index) + vacc + viral + infected + eligible + sex + age + arm$$

where: *p<sub>cr</sub>*: binary COVID-19 test result, *index*: index case in the household – treated as a random effect, *vacc*: number of vaccinated household members, *viral*: log<sub>10</sub> viral load of the index case at the beginning of the period, *infected*: number of COVID-19 positive household members at the beginning of the period, *eligible*: whether the household contact was eligible for treatment, *sex*: sex of the household contact, *age*: age of the household contact, and *arm*: study arm (i.e. SOC/IFN) of the household were the fixed explanatory variables.

The features of the model were the same as the exploratory frequentist analysis, with the exception of adding the treatment period as a feature. Instead, the Bayesian analysis split the data into two periods (Period 1: study days 1–11, Period 2: study days 12–29) with analysis conducted separately. For period 2, COVID-19 positivity at day 11 was used to determine COVID-19 positive household members at the beginning of the period. The population used for analysis was the same as the “At-risk” population used in the exploratory frequentist analysis (Supplementary Table 6), with the additional exclusion of participants in households with a size larger than 8.

### **Computation of difference in probability of infection in IFN vs SOC arms**

In each simulation, we obtained a PCR outcome for each contact from the Bayesian model by applying the `posterior_predict` function in the `rstanarm` package to the observed data (1). We further computed the percent of infections in each treatment arm irrespective of household size (Supplementary Table 8) and for each household size (Supplementary Table 9). Furthermore, we computed the difference in probability of infection by subtracting the probability of infection in IFN arm from the probability of infection in SOC arm. As a results, we obtained 4000 differences (irrespective of household size) and 4000 differences for each household size

Significance of the treatment effect was determined by 95% credible interval (CrI) for the treatment Beta coefficient. If 0 was included in the CrI, the effect of treatment group was considered not significant. Average Beta coefficient and odds ratio for the effect of the IFN treatment as compared to SOC were computed in each study period. The average odds ratio of being infected with SARS-CoV-2 on IFN treatment vs. SOC was calculated by exponentiating the values of the average of the coefficients (Supplementary Table 7).

## Supplementary Results

### **Bayesian analysis of infection reduction**

Treatment with IFN had a significant effect in study period 1 as the 95% CrI for treatment coefficient did not include zero (Supplementary Table 7). However, IFN treatment did not have a significant effect in period 2 as the 95% CrI did include zero (Supplementary Table 7).

In study period 1, there was 95% probability of infection reduction between 0.9% to 15.9% due to the IFN treatment, with 8.5% median and mean infection reduction (Supplementary Table 8). In study period 2, there are 95% probability of infection reduction -6.7% to 4.8% due to the IFN treatment, with -9% of median and mean of infection reduction (Supplementary Table 8).

When we stratified the infection reduction by household size, only households' size 3 and 4 in period 1 had a 95% CrI without zero (Supplementary Table 9).

As the distribution of Bayesian estimated differences in probabilities of infection in study period 1 is centred to the right of 0 (Supplementary Figure 3A), IFN treatment had an effect on reducing SARS-CoV-2 transmission within households. However, as the distribution in study period 2 is centred around 0, it suggests IFN has no effect on SARS-CoV-2 transmission within households (Supplementary Figure 3B).

Supplementary Figures

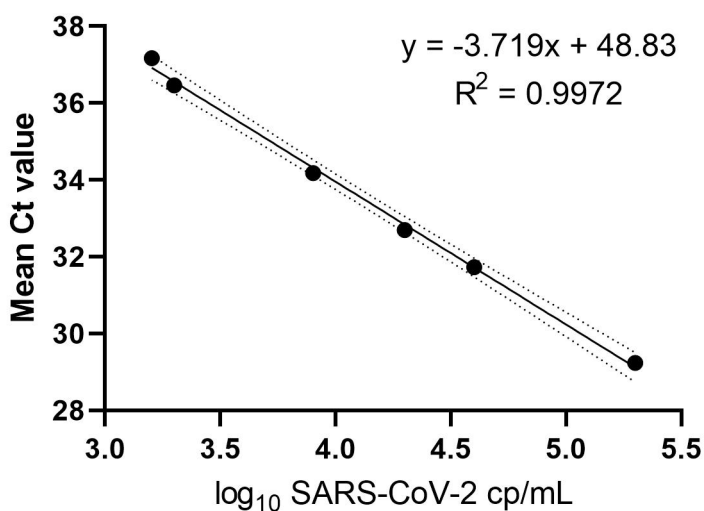

**Supplementary Figure 1: Standard curve for calculation of SARS-CoV-2 viral load.** Mean cycle threshold (Ct) values are plotted on the y-axis, and log<sub>10</sub> SARS-CoV-2 copies per mL (cp/mL) are plotted on the x-axis. Linear regression resulted in an  $R^2$  value of 0.9972, to fit the equation  $y = -3.719x + 48.83$ .

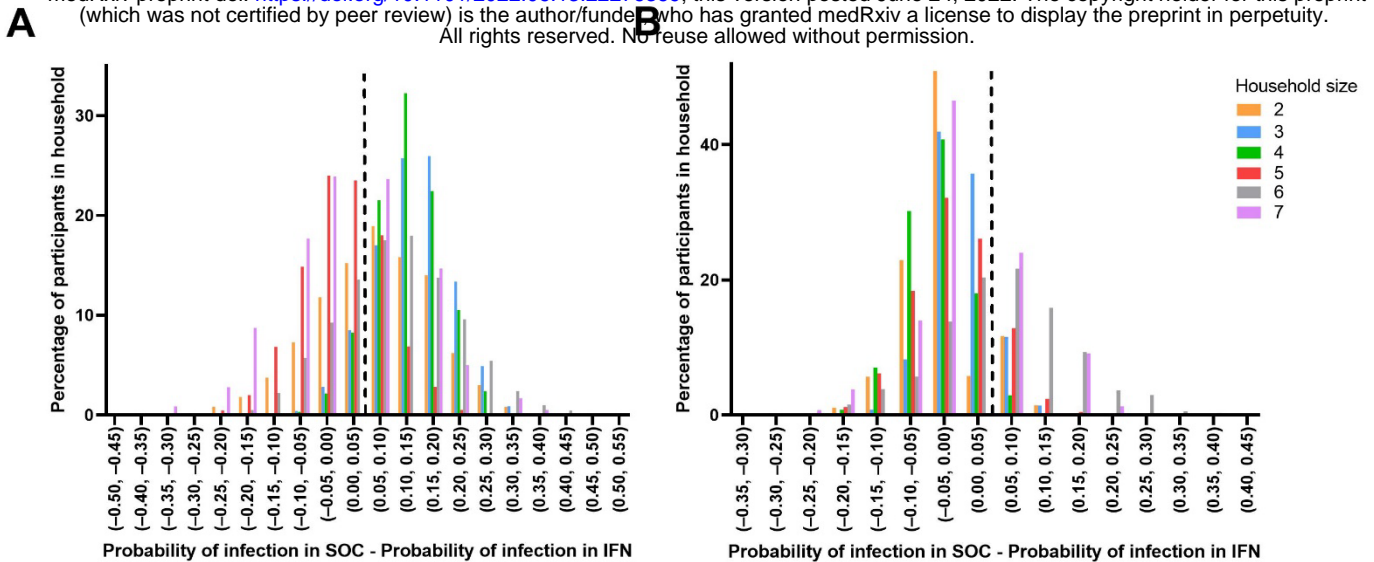

**Supplementary Figure 2: Distribution of the difference in probability of infection between SOC and IFN arms by household size.** (A) Distribution in study period 1, and (B) Distribution in study period 2. Vertical dashed black line represents zero difference in probability of infection between SOC and IFN arms.

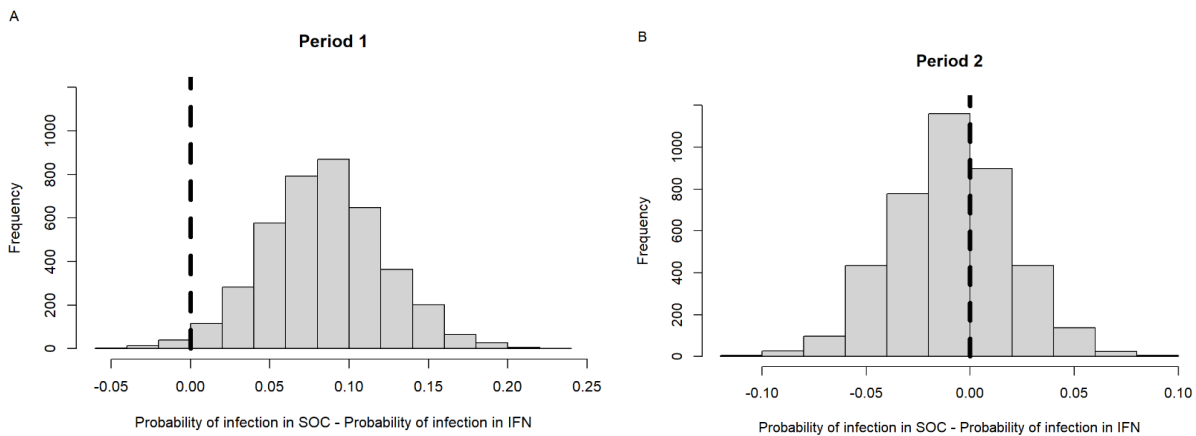

**Supplementary Figure 3: Distribution of the difference in probability of infection between SOC and IFN arms.** (A) Distribution in study period 1, and (B) Distribution in study period 2. Vertical black line represents zero difference in probability of infection between SOC and IFN arms.

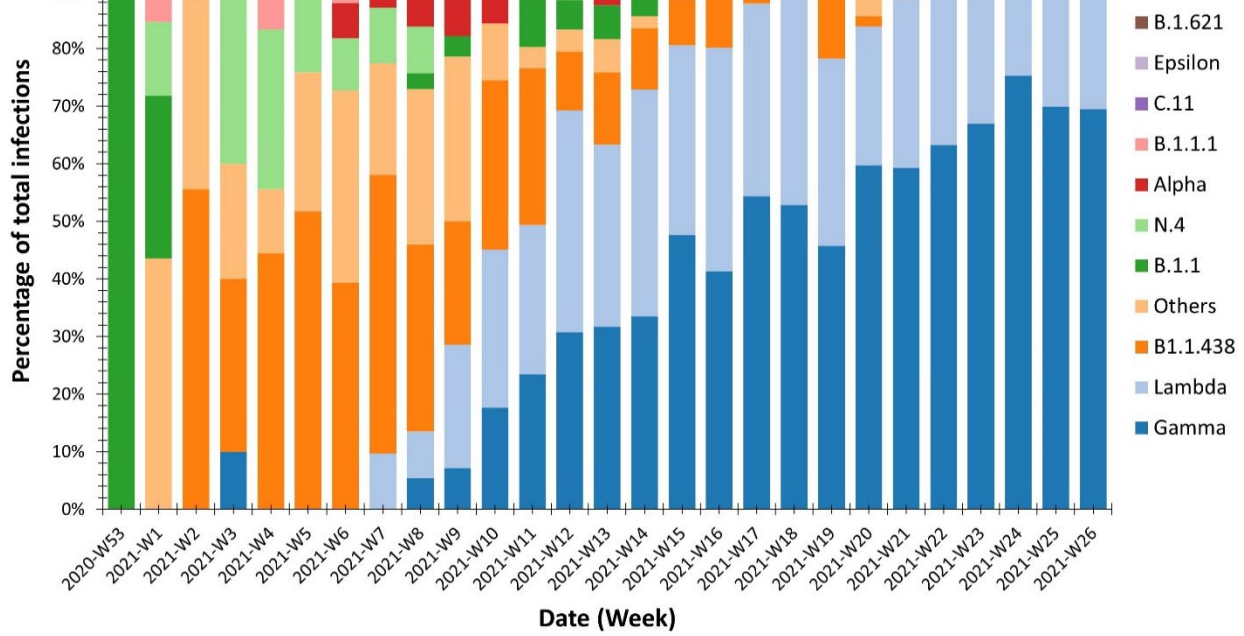

**Supplementary Figure 4: COVID-19 variants detected in Santiago, Chile during study recruitment.** Data represents COVID-19 variants detected as a percentage of the total infections detected during this period.

## Supplementary Tables

| Primary Objectives                                                                                                                                                                                                                                                                                                          | Outcome & Outcome Measure                                                                                                                                                                                          |
|-----------------------------------------------------------------------------------------------------------------------------------------------------------------------------------------------------------------------------------------------------------------------------------------------------------------------------|--------------------------------------------------------------------------------------------------------------------------------------------------------------------------------------------------------------------|
| To determine whether IFN $\beta$ -1 $\alpha$ treatment reduces the proportion of infected cases shedding SARS-CoV-2 at day 11 after randomization.                                                                                                                                                                          | The proportion of index cases shedding SARS-CoV-2 at day 11 in the active arm compared to the standard of care arm                                                                                                 |
| To determine whether IFN $\beta$ -1 $\alpha$ treatment reduces the incidence of SARS-CoV-2 transmission from index cases to treatment-eligible household contacts, as measured by any positive upper airway infection evidenced by real-time Polymerase Chain Reaction (RT-PCR), in contacts at day 11 after randomization. | The proportion of household contacts shedding SARS-CoV-2 at day 11 in the active arm compared to the standard of care arm                                                                                          |
| Secondary Objectives                                                                                                                                                                                                                                                                                                        | Outcome & Outcome Measure                                                                                                                                                                                          |
| To determine whether in index cases infected with SARS-CoV-2, IFN $\beta$ -1 $\alpha$ treatment compared with standard of care reduces the duration of SARS-CoV-2 upper airway virus shedding over 28 days following randomization.                                                                                         | Duration (in days) of SARS-CoV-2 measured by PCR of samples taken on study days 1, 6, 11, 16, 21, and 29                                                                                                           |
| To determine whether IFN $\beta$ -1 $\alpha$ treatment affects the incidence of SARS-CoV-2 upper airway infection or serological conversion by study day 29 in household contacts.                                                                                                                                          | Number of household contacts of participants in the IFN arm with positive upper airway PCR compared to that in the standard of care arm at day 1 & 11, and seroconversion (IgM) over the study period up to day 29 |
| To determine whether IFN $\beta$ -1 $\alpha$ treatment compared with standard of care reduces the proportion of infected cases that require hospital admission or die due to COVID-19                                                                                                                                       | The proportion of infected cases in the active arm that are hospitalized or die due to COVID-19, as compared to the proportion in the standard of care arm                                                         |
| To determine the safety of IFN $\beta$ -1 $\alpha$ in the treatment and prevention of SARS-CoV-2 infection                                                                                                                                                                                                                  | Incidence and severity of reported adverse events in the active arm compared to the standard of care arm                                                                                                           |
| Exploratory Objectives                                                                                                                                                                                                                                                                                                      | Biological samples and associated data will be stored for later access for ethically approved research relevant to the exploratory objectives                                                                      |
| Assess the impact of participant demographic and clinical metadata on the viral transmission dynamics and response to IFN $\beta$ -1 $\alpha$ in the household using unbiased systems epidemiology                                                                                                                          |                                                                                                                                                                                                                    |

---

Assess the impact of hostbiology on the viral transmission dynamics and response to IFN  $\beta$ -1 $\alpha$  in the household using unbiased systems biology

---

Integrate the demographic and clinical data with the biological host data to decipher potential interactions relevant to outcome of infection or exposure, as well as response to IFN  $\beta$ -1 $\alpha$  intervention

---

Integrate the demographic and clinical data with the biological host data to decipher potential interactions relevant to outcome of infection or exposure, as well as response to IFN  $\beta$ -1 $\alpha$  intervention

---

Estimate the secondary infection rate, serial interval, incubation period, duration of infectiousness, duration of detected shedding

---

*Individual level:* SARS-CoV-2 shedding as determined by PCR of upper respiratory samples analyzed as a function of time of exposure relative to the start of the intervention

---

*Household/Community level:* While each study arm will be assessed independently of each other as secondary objectives, we will assess the impact of any intervention on the entire household. When demographic and/or biological variables

---

Host immune response (anti SARS-CoV-2 antibodies, blood cytokines and chemokines), as well as blood and nasal mucosal host response (including but not limited to transcriptomics, metabolomics, proteomics, and epigenomics) to IFN  $\beta$ -1 $\alpha$  intervention, SARS-CoV-2 infection and their interaction

---

**Supplementary Table 1: Primary, secondary, and exploratory outcomes for the Containing Coronavirus Disease-19 clinical trial**



|                                    | Visit 1                   | Visit 2                   | Visit 3                    | Visit 4   | Visit 5   | Visit 6   | Extra Visit<br>– Suspected<br>COVID-19 |
|------------------------------------|---------------------------|---------------------------|----------------------------|-----------|-----------|-----------|----------------------------------------|
| <b>Study Day</b>                   | <b>1</b><br><b>Dose 1</b> | <b>6</b><br><b>Dose 2</b> | <b>11</b><br><b>Dose 3</b> | <b>16</b> | <b>21</b> | <b>29</b> |                                        |
| <b>Blood Samples</b>               |                           |                           |                            |           |           |           |                                        |
| Complete Blood count/ ESR          | X                         |                           |                            |           |           | X         | X                                      |
| SARS-CoV-2 antibodies (IgGAM)      | X                         |                           |                            |           |           | X         |                                        |
| Study sample 1                     | X                         | X                         | X                          |           |           | X         | X                                      |
| Study sample 2                     | X                         | X                         | X                          |           |           | X         | X                                      |
| Study sample 3                     | X                         | X                         | X                          |           |           | X         | X                                      |
| <b>Airway samples</b>              |                           |                           |                            |           |           |           |                                        |
| Nasal brush                        | X                         |                           |                            |           |           |           |                                        |
| Nasal lining fluid                 | X                         | X                         | X                          |           |           |           |                                        |
| Airway Swab for COVID-19 diagnosis |                           |                           |                            |           |           |           | X                                      |
| <b>Saliva Samples</b>              |                           |                           |                            |           |           |           |                                        |
| Saliva                             | X                         | X                         | X                          | X         | X         | X         | X                                      |

**Supplementary Table 2: Schedule of laboratory assessments for index cases and treatment eligible household contacts.**

|                                    | <b>Visit 1</b>            | <b>Visit 2</b>            | <b>Visit 3</b>             | <b>Visit 4</b> | <b>Visit 5</b> | <b>Visit 6</b> | <b>Extra Visit<br/>– Suspected<br/>COVID-19</b> |
|------------------------------------|---------------------------|---------------------------|----------------------------|----------------|----------------|----------------|-------------------------------------------------|
| <b>Study Day</b>                   | <b>1</b><br><b>Dose 1</b> | <b>6</b><br><b>Dose 2</b> | <b>11</b><br><b>Dose 3</b> | <b>16</b>      | <b>21</b>      | <b>29</b>      |                                                 |
| <b>Blood Samples</b>               |                           |                           |                            |                |                |                |                                                 |
| Complete Blood count/ ESR          |                           |                           |                            |                |                |                | <b>X</b>                                        |
| SARS-CoV-2 antibodies (IgGAM)      |                           |                           |                            |                |                | <b>X</b>       |                                                 |
| Study sample 1                     |                           |                           |                            |                |                | <b>X</b>       | <b>X</b>                                        |
| Study sample 2                     |                           |                           |                            |                |                | <b>X</b>       | <b>X</b>                                        |
| Study sample 3                     |                           |                           |                            |                |                | <b>X</b>       | <b>X</b>                                        |
| <b>Airway samples</b>              |                           |                           |                            |                |                |                |                                                 |
| Nasal brush                        | <b>X</b>                  |                           |                            |                |                |                |                                                 |
| Nasal lining fluid                 | <b>X</b>                  | <b>X</b>                  | <b>X</b>                   |                |                |                |                                                 |
| Airway Swab for COVID-19 diagnosis |                           |                           |                            |                |                |                | <b>X</b>                                        |
| <b>Saliva Samples</b>              |                           |                           |                            |                |                |                |                                                 |
| Saliva                             | <b>X</b>                  | <b>X</b>                  | <b>X</b>                   | <b>X</b>       | <b>X</b>       | <b>X</b>       | <b>X</b>                                        |

**Supplementary Table 3: Schedule of laboratory assessments for treatment ineligible household contacts.**

| Interferon arm             |                      |   |   |    |    |    |    |    |    | Standard of Care arm       |                      |   |   |    |    |    |    |    |    |
|----------------------------|----------------------|---|---|----|----|----|----|----|----|----------------------------|----------------------|---|---|----|----|----|----|----|----|
| Withdrawal reason          | Days since enrolment |   |   |    |    |    |    |    |    | Withdrawal reason          | Days since enrolment |   |   |    |    |    |    |    |    |
|                            | 3                    | 4 | 5 | 10 | 11 | 14 | 15 | 21 | 28 |                            | 3                    | 4 | 5 | 10 | 11 | 14 | 15 | 25 | 28 |
| Family withdrew            | 0                    | 0 | 5 | 0  | 0  | 2  | 0  | 0  | 0  | Family withdrew            | 0                    | 0 | 2 | 0  | 0  | 0  | 0  | 0  | 0  |
| Interpersonal problems     | 0                    | 0 | 3 | 0  | 0  | 0  | 0  | 0  | 0  | Interpersonal problems     | 0                    | 4 | 0 | 0  | 0  | 0  | 0  | 0  | 0  |
| Lack of time               | 0                    | 1 | 0 | 0  | 0  | 0  | 0  | 0  | 0  | Lack of time               | 0                    | 0 | 0 | 0  | 0  | 0  | 0  | 0  | 0  |
| Other                      | 0                    | 0 | 0 | 0  | 0  | 0  | 0  | 0  | 0  | Other                      | 0                    | 0 | 1 | 0  | 0  | 0  | 0  | 0  | 0  |
| Parental decision          | 0                    | 0 | 2 | 0  | 0  | 0  | 0  | 0  | 0  | Parental decision          | 0                    | 0 | 0 | 0  | 0  | 0  | 0  | 0  | 0  |
| Poor health                | 0                    | 0 | 1 | 0  | 0  | 1  | 0  | 0  | 0  | Poor health                | 0                    | 0 | 0 | 0  | 0  | 0  | 0  | 0  | 0  |
| Sample collection problems | 0                    | 0 | 0 | 0  | 0  | 0  | 0  | 0  | 0  | Sample collection problems | 0                    | 0 | 1 | 0  | 0  | 0  | 0  | 0  | 0  |
| Side effects of drug       | 0                    | 0 | 0 | 0  | 0  | 2  | 0  | 0  | 0  | Side effects of drug       | 0                    | 0 | 0 | 0  | 0  | 0  | 0  | 0  | 0  |
| Uninterested               | 0                    | 0 | 0 | 1  | 0  | 0  | 0  | 0  | 1  | Uninterested               | 0                    | 0 | 0 | 0  | 0  | 0  | 0  | 0  | 0  |
| Unspecified                | 4                    | 3 | 1 | 2  | 1  | 0  | 0  | 0  | 0  | Unspecified                | 0                    | 1 | 3 | 0  | 0  | 0  | 1  | 5  | 0  |
| Work commitments           | 0                    | 0 | 2 | 2  | 0  | 0  | 0  | 0  | 0  | Work commitments           | 0                    | 0 | 0 | 0  | 0  | 0  | 0  | 0  | 0  |

**Supplementary Table 4: Study withdrawal reasons by treatment arm.**

| <b>Reasons for exclusion from ConCorD-19 during screening</b> |  | <b>Participants (n)</b> |
|---------------------------------------------------------------|--|-------------------------|
| Unable to be contacted                                        |  | 736                     |
| Days of symptoms > 5                                          |  | 777                     |
| Asymptomatic                                                  |  | 306                     |
| Isolating from household contacts                             |  | 219                     |
| Hospitalized                                                  |  | 177                     |
| Confirmation of COVID-19 took longer than 72 hours            |  | 35                      |
| Deceased                                                      |  | 2                       |
| Ineligible medical condition or treatment                     |  | 67                      |
| Less than 18 years old                                        |  | 54                      |
| Pregnant, or plans on becoming pregnant                       |  | 32                      |
| Previously infected with COVID-19                             |  | 36                      |
| Greater than 80 years old                                     |  | 3                       |
| All eligible household contacts currently infected            |  | 514                     |
| Does not live with eligible household contact                 |  | 412                     |
| Not the first infection in the household                      |  | 392                     |
| Does not live in the Santiago metropolitan area               |  | 20                      |
| <b>Reasons for not participating in ConCorD-19</b>            |  |                         |
| Index case declined                                           |  | 835                     |
| Eligible household contact declined                           |  | 196                     |
| <b>Total</b>                                                  |  | <b>4813</b>             |

**Supplementary Table 5: Reasons for exclusion from study participation during screening and reasons for declined participation following invitation to participate in ConCorD-19.**

| Analyses outlined in SAP  |                                                      | Exclusions                       |                  |                  | Participants (n) included for analyses |     |     |
|---------------------------|------------------------------------------------------|----------------------------------|------------------|------------------|----------------------------------------|-----|-----|
| Analysis                  | Population                                           | Reason                           | Participants (n) |                  | IFN                                    | SOC |     |
|                           | Full study population                                |                                  |                  | IC               | 172                                    | 169 |     |
|                           |                                                      |                                  |                  | EHC              | 177                                    | 165 |     |
|                           |                                                      |                                  |                  | CP-HC            | 80                                     | 81  |     |
|                           |                                                      |                                  |                  | IHC              | 178                                    | 150 |     |
| Primary 1 - Main          | IC-INF at day 11                                     | No visit                         | 22               | IC               | 159                                    | 164 |     |
|                           |                                                      | Visit outside window             | 3                | CP-HC            | 69                                     | 76  |     |
| Primary 1 – Sensitivity 1 | IC-ITT at day 11                                     | No visit                         | 12               | IC               | 159                                    | 164 |     |
|                           |                                                      | Visit outside window             | 2                |                  |                                        |     |     |
| Primary 1 – Sensitivity 2 | IC-PP at day 11                                      | No visit or protocol deviation   | 26               | IC               | 146                                    | 164 |     |
|                           |                                                      | Visit outside window             | 1                |                  |                                        |     |     |
| Primary 2 – Main          | EHC-ITT at day 11                                    | No visit                         | 20               | EHC              | 166                                    | 156 |     |
| Primary 2 – Sensitivity 1 | HC at day 11                                         | No visit                         | 37               | EHC              | 166                                    | 156 |     |
|                           |                                                      |                                  |                  | IHC              | 168                                    | 143 |     |
| Primary 2 – Sensitivity 2 | EHC-PP at day 11                                     | No visit or protocol deviation   | 30               | EHC              | 156                                    | 156 |     |
| Exploratory Analyses      |                                                      | Exclusions                       |                  |                  |                                        |     |     |
| Analysis                  | Population                                           | Reason                           | Households (n)   | Participants (n) |                                        |     |     |
| Frequentist               | Household contacts, COVID-19 negative at study day 1 | COVID-negative index case        | 33               |                  | EHC                                    | 164 | 142 |
|                           |                                                      | No household contacts at risk    | 49               |                  |                                        |     |     |
|                           |                                                      | Household contact COVID positive |                  | 43               | IHC                                    | 129 | 104 |
| Bayesian                  | Frequentist population, household size $\leq 7$      | Household size $> 7$             | 5                | 61               | EHC                                    | 152 | 139 |
|                           |                                                      |                                  |                  |                  | IHC                                    | 113 | 104 |

**Supplementary Table 6: Study populations used for analysis, and reasons for exclusion from analysis.** IC: index case, EHC: Treatment eligible household contacts, CP-HC: COVID-19 positive household contacts, IHC: Treatment ineligible household contacts, IC-INF: IC & CP-HC, IC-ITT: Index case – intention to treat population, IC-PP: Index case – per protocol population, EHC-ITT: Treatment eligible household contacts – intention to treat population, HC: EHC and IHC, EHC-PP: Treatment eligible household contact – per protocol population.

**Coefficient for treatment with IFN** **95% Credible Intervals**

| Study period | Mean  | Standard Deviation | Lower limit (2.5%) | Upper limit (97.5%) |
|--------------|-------|--------------------|--------------------|---------------------|
| 1            | -1.17 | 0.52               | -2.23              | -0.19               |
| 2            | 0.27  | 0.55               | -0.80              | 1.36                |

**Odds ratio for treatment with IFN**

**95% Credible Intervals**

| Study period | Mean | Standard Deviation | Lower limit (2.5%) | Upper limit (97.5%) |
|--------------|------|--------------------|--------------------|---------------------|
| 1            | 0.32 | 1.68               | 0.11               | 0.83                |
| 2            | 1.31 | 1.73               | 0.45               | 3.90                |

**Supplementary Table 7: Bayesian estimated beta coefficients and odds ratio for treatment with IFN, with average values and 95% credible intervals.**

| Study period | 2.5%   | 25%    | 50%    | Mean   | 75%   | 97.5% |
|--------------|--------|--------|--------|--------|-------|-------|
| 1            | 0.009  | 0.059  | 0.085  | 0.085  | 0.110 | 0.159 |
| 2            | -0.067 | -0.028 | -0.009 | -0.009 | 0.010 | 0.048 |

**Supplementary Table 8: Difference in probability of infection in each study period**

**irrespective of household size.** Data is the mean, median, and 95% CrI difference in probability of infection in each study period, computed as probability of infection in the SOC arm minus the probability of infection in the IFN arm.

| Study period | Household size | 2.5%   | 25%    | 50%   | Mean   | 75%    | 97.5% |
|--------------|----------------|--------|--------|-------|--------|--------|-------|
| 1            | 2              | -0.143 | 0.000  | 0.286 | 0.053  | 0.143  | 0.286 |
| 1            | 3              | 0.000  | 0.092  | 0.276 | 0.139  | 0.184  | 0.276 |
| 1            | 4              | 0.003  | 0.087  | 0.249 | 0.128  | 0.170  | 0.249 |
| 1            | 5              | -0.146 | -0.046 | 0.158 | 0.005  | 0.058  | 0.158 |
| 1            | 6              | -0.120 | 0.030  | 0.326 | 0.103  | 0.189  | 0.326 |
| 1            | 7              | -0.231 | -0.077 | 0.308 | 0.024  | 0.077  | 0.308 |
| 2            | 2              | -0.118 | -0.059 | 0.075 | -0.008 | 0.000  | 0.075 |
| 2            | 3              | -0.085 | -0.021 | 0.090 | 0.001  | 0.028  | 0.090 |
| 2            | 4              | -0.130 | -0.068 | 0.059 | -0.037 | -0.006 | 0.059 |
| 2            | 5              | -0.128 | -0.052 | 0.103 | -0.013 | 0.027  | 0.103 |
| 2            | 6              | -0.129 | -0.015 | 0.254 | 0.059  | 0.117  | 0.254 |
| 2            | 7              | -0.154 | 0.000  | 0.154 | 0.016  | 0.077  | 0.154 |

**Supplementary Table 9: Difference in probability of infection in each study period, stratifying by household size.** Data is the mean, median, and 95% CrI difference in probability of infection in each study period, computed as probability of infection in the SOC arm minus the probability of infection in the IFN arm.

| Household size | Number of households | Single Contacts | Multiple Contacts |
|----------------|----------------------|-----------------|-------------------|
| 2              | 42                   | 42              | 0                 |
| 3              | 61                   | 64              | 27                |
| 4              | 80                   | 84              | 89                |
| 5              | 46                   | 58              | 59                |
| 6              | 19                   | 29              | 30                |
| 7              | 6                    | 14              | 12                |

**Supplementary Table 10: Number of contacts at each household size.**

## Supplementary References

1. Goodrich B GJ, Ali I, Brilleman S. rstanarm: Bayesian applied regression modeling via Stan. R package version 2.21.3 ed2022.



## Supplementary Appendices

## **Containing Coronavirus Disease 19 Trial (CONCORD-19): Statistical Analysis Report**

# Containing Coronavirus Disease 19 Trial (CONCORD-19)

## Statistical Analysis Report

---

|                                          |                                   |
|------------------------------------------|-----------------------------------|
| <b>Design</b>                            | Cluster randomised clinical trial |
| <b>ClinicalTrials.gov identifier</b>     | NCT04552379                       |
| <b>Protocol version</b>                  | 3.1                               |
| <b>Statistical Analysis Plan version</b> | 2.5                               |

---

### Principal Investigators

Stephen Stick, MB BChir PhD MRCP FRACP

Perth Children's Hospital

15 Hospital Avenue, Nedlands WA 6009, Australia

Jose Antonio Castro-Rodriguez, MD PhD

School of Medicine, Pontificia Universidad Católica de Chile

Diagonal Paraguay 367, Santiago, Chile

### Author

Virginia Chen, MA

Senior Data Scientist

PROOF Centre of Excellence

Vancouver, BC, Canada

## Signatures

### Statistician (Author)

Virginia Chen

---

### Statistician (Reviewer)

Robert Balshaw

## Statistician (Reviewer)

Casey P. Shannon

---

# Table of Contents

- 1 [Abbreviations](#)
- 2 [Introduction](#)
  - 2.1 [Document Purpose](#)
  - 2.2 [Trial Objectives](#)
  - 2.3 [Executive Summary](#)
  - 2.4 [Deviations from the SAP](#)
  - 2.5 [Other Details](#)
- 3 [Analysis Populations and Participant Disposition](#)
  - 3.1 [Full Analysis Population](#)
  - 3.2 [Index Case - Intention-to-treat Population IC-ITT](#)
  - 3.3 [Index Case - Per Protocol Population IC-PP](#)
  - 3.4 [Infected Case Population IC-INF](#)
  - 3.5 [Treatment-eligible Household Contact - Intention-to-treat Population EHC-ITT](#)
  - 3.6 [Treatment-eligible Household Contact - Per Protocol Population EHC-PP](#)
  - 3.7 [Household Contact Population HC](#)
  - 3.8 [Safety Population](#)
- 4 [Withdrawals](#)
  - 4.1 [Overall](#)
  - 4.2 [By Treatment Arm](#)
- 5 [Missing Data](#)
- 6 [Baseline Characteristics](#)
  - 6.1 [Full Analysis Population](#)
  - 6.2 [IC-ITT Population](#)
  - 6.3 [IC-INF Population](#)
  - 6.4 [EHC-ITT Population](#)
  - 6.5 [HC Population](#)
- 7 [Primary Analyses SAP 6.10](#)

- 7.1 Primary Analysis 1 SAP 6.10.1
- 7.2 Primary Analysis 2 SAP 6.10.2
- 8 Secondary Analyses
  - 8.1 Secondary Analysis 1 SAP 6.10.3
  - 8.2 Secondary Analysis 2 SAP 6.10.4
  - 8.3 Secondary Analysis 3 SAP 6.10.5
  - 8.4 Secondary Analysis 4 SAP 6.10.6
- 9 Safety Analysis SAP 6.11
- 10 Additional Analyses SAP 6.12
  - 10.1 Dose-response and Recovery SAP 6.12.1
  - 10.2 Dose-response and Transmission SAP 6.12.2
  - 10.3 Viral Load SAP 6.12.3
- 11 Optional Analyses
  - 11.1 Bayesian Analysis
  - 11.2 Exploratory Two-period Generalized Mixed Effects Model

# 1 Abbreviations

|                   |                                                 |
|-------------------|-------------------------------------------------|
| <b>AE</b>         | adverse event                                   |
| <b>AR</b>         | absolute risk                                   |
| <b>ARR</b>        | absolute risk reduction                         |
| <b>GLM</b>        | generalized linear model                        |
| <b>GLMM</b>       | generalized linear mixed model                  |
| <b>HR</b>         | hazard ratio                                    |
| <b>IFN</b>        | interferon beta 1alpha (Biogen)                 |
| <b>ITT</b>        | intention-to-treat                              |
| <b>OR</b>         | odds ratio                                      |
| <b>PCR</b>        | polymerase chain reaction                       |
| <b>RR</b>         | risk ratio                                      |
| <b>SAE</b>        | serious adverse event                           |
| <b>SAP</b>        | statistical analysis plan                       |
| <b>SARS-CoV-2</b> | severe acute respiratory syndrome coronavirus 2 |
| <b>SD</b>         | standard deviation                              |
| <b>SOC</b>        | standard of care                                |
| <b>SOP</b>        | standard operating procedure                    |

## 2 Introduction

### 2.1 Document Purpose

This document contains the results of the analyses described in the CONCORD-19 Statistical Analysis Plan (SAP). Descriptions of the analyses are omitted where the analysis proceeded as planned in the SAP. Any details or clarifying text are intended to be read in the context of the SAP.

### 2.2 Trial Objectives

#### 2.2.1 Primary Objectives

1. To determine whether IFN therapy reduces the number of infected cases still shedding SARS-CoV-2 in saliva at day 11 following randomisation.
2. To determine whether IFN therapy reduces the incidence of SARS CoV-2 transmission from index cases to treatment-eligible household contacts, as measured by any positive upper airway PCR in treatment-eligible household contacts at day 11 after randomisation

#### 2.2.2 Secondary Objectives

1. To determine whether in index cases infected with SARS-CoV-2, IFN therapy compared with SOC reduces the duration of a saliva positive polymerase chain reaction (PCR) SARS-CoV-2 test over 28 days following randomisation.
2. To determine if IFN affects the incidence of saliva positive PCR SARS-CoV-2 tests or serological conversion by study day 29 in household contacts, compared with SOC.
3. To determine if IFN therapy, compared with SOC, reduces the proportion of infected cases that require hospital admission or die due to COVID-19.
4. To determine the safety of IFN treatment.

#### 2.2.3 Exploratory Objectives

Exploratory objectives were not pursued at this stage.

### 2.3 Executive Summary

#### **Primary objective 1**

- Results do not suggest an effect

#### **Primary objective 2**

• Results suggest that IFN may reduce transmission to household contacts by study day 11, but statistical significance was not achieved in any analysis

### Secondary objective 1

- Results do not suggest an effect

### Secondary objective 2

- Results do not suggest an effect

### Secondary objective 3

- Results suggest that IFN may increase duration of hospital stay, but statistical significance was not achieved in the main analysis
- IFN was statistically significant for reducing incidence of hospitalization in the sensitivity analyses
- IFN was statistically significant for increasing duration of hospital stay, in the sensitivity analyses

### Secondary objective 4

- IFN was statistically significant for increasing incidence of treatment-related adverse events, but not for adverse events or serious adverse events in general

## 2.4 Deviations from the SAP

1. Two unplanned sensitivity analyses were added that take into account days between symptom onset and visit date for index cases. See “Adjusted for Days Between Symptom Onset and Visit Date” sections under “Sensitivity Analyses” for each Primary Objective.
2. Index cases occasionally had a negative PCR result on study day 1, despite testing positive prior to enrollment and testing positive at study day 6, 11, or 16. In these cases, their study day 1 viral load was imputed as 50% of their first non-negative viral load recorded during the study. These imputed values were used only in sensitivity analyses and additional analyses. Additionally, a sensitivity analysis will be performed for primary analysis 1, by excluding index cases that tested negative at *both* study day 1 and 6.
3. **An additional exploratory analysis into treatment effect during (D1-D11) and after (D12-29) discontinuation of treatment/household isolation is included (under Optional Analyses at the end of the report).**

## 2.5 Other Details

For inclusion as a covariate, age was discretised by quartile. The breakdown is as follows:

SOC IFN

| Age < 18       | 139 | 162 |
|----------------|-----|-----|
| 18 < Age <= 34 | 135 | 163 |
| 34 < Age <= 48 | 135 | 155 |
| 48 <= Age      | 156 | 127 |

## 3 Analysis Populations and Participant Disposition

### 3.1 Full Analysis Population

| IFN                                    | # Visits conducted at study day |     |     |     |     |     | SOC                                    | # Visits conducted at study day |            |     |     |     |     |
|----------------------------------------|---------------------------------|-----|-----|-----|-----|-----|----------------------------------------|---------------------------------|------------|-----|-----|-----|-----|
|                                        | 1                               | 6   | 11  | 16  | 21  | 29  |                                        | 1                               | 6          | 11  | 16  | 21  | 29  |
|                                        | Index case                      | 172 | 162 | 160 | 159 | 158 |                                        | 162                             | Index case | 169 | 165 | 165 | 162 |
| Treatment-eligible household contact   | 177                             | 171 | 166 | 162 | 163 | 163 | Treatment-eligible household contact   | 165                             | 159        | 156 | 154 | 150 | 154 |
| COVID-positive household contact       | 80                              | 74  | 70  | 67  | 69  | 69  | COVID-positive household contact       | 81                              | 78         | 76  | 72  | 77  | 78  |
| Treatment-ineligible household contact | 178                             | 173 | 168 | 169 | 169 | 167 | Treatment-ineligible household contact | 150                             | 144        | 143 | 143 | 140 | 143 |

| IFN                                    | Reason for no visit |                   |                        |       |
|----------------------------------------|---------------------|-------------------|------------------------|-------|
|                                        | Withdrawal          | Household request | Research team decision | Other |
| Index case                             | 37                  | 3                 | 0                      | 19    |
| Treatment-eligible household contact   | 45                  | 1                 | 0                      | 14    |
| COVID-positive household contact       | 44                  | 0                 | 0                      | 7     |
| Treatment-ineligible household contact | 30                  | 0                 | 0                      | 14    |

| SOC | Reason for no visit |  |  |  |
|-----|---------------------|--|--|--|
|     |                     |  |  |  |



|                                        | Withdrawal | Household request | Research team decision | Other |
|----------------------------------------|------------|-------------------|------------------------|-------|
| Index case                             | 12         | 7                 | 0                      | 10    |
| Treatment-eligible household contact   | 32         | 5                 | 0                      | 15    |
| COVID-positive household contact       | 6          | 1                 | 0                      | 17    |
| Treatment-ineligible household contact | 24         | 5                 | 0                      | 8     |

### 3.2 Index Case - Intention-to-treat Population IC-ITT

| IFN                                    | # Visits conducted at study day |     |     |     |     |     | SOC                                    | # Visits conducted at study day |            |     |     |     |     |
|----------------------------------------|---------------------------------|-----|-----|-----|-----|-----|----------------------------------------|---------------------------------|------------|-----|-----|-----|-----|
|                                        | 1                               | 6   | 11  | 16  | 21  | 29  |                                        | 1                               | 6          | 11  | 16  | 21  | 29  |
|                                        | Index case                      | 172 | 162 | 160 | 159 | 158 |                                        | 162                             | Index case | 169 | 165 | 165 | 162 |
| Treatment-eligible household contact   | 0                               | 0   | 0   | 0   | 0   | 0   | Treatment-eligible household contact   | 0                               | 0          | 0   | 0   | 0   | 0   |
| COVID-positive household contact       | 0                               | 0   | 0   | 0   | 0   | 0   | COVID-positive household contact       | 0                               | 0          | 0   | 0   | 0   | 0   |
| Treatment-ineligible household contact | 0                               | 0   | 0   | 0   | 0   | 0   | Treatment-ineligible household contact | 0                               | 0          | 0   | 0   | 0   | 0   |

### 3.3 Index Case - Per Protocol Population IC-PP

| IFN                                  | # Visits conducted at study day |     |     |     |     |     | SOC                                  | # Visits conducted at study day |            |     |     |     |     |
|--------------------------------------|---------------------------------|-----|-----|-----|-----|-----|--------------------------------------|---------------------------------|------------|-----|-----|-----|-----|
|                                      | 1                               | 6   | 11  | 16  | 21  | 29  |                                      | 1                               | 6          | 11  | 16  | 21  | 29  |
|                                      | Index case                      | 146 | 146 | 146 | 145 | 143 |                                      | 145                             | Index case | 169 | 165 | 165 | 162 |
| Treatment-eligible household contact | 0                               | 0   | 0   | 0   | 0   | 0   | Treatment-eligible household contact | 0                               | 0          | 0   | 0   | 0   | 0   |
| COVID-positive                       | 0                               | 0   | 0   | 0   | 0   | 0   | COVID-positive                       | 0                               | 0          | 0   | 0   | 0   | 0   |

|                                        | 1 | 6 | 11 | 16 | 21 | 29 |                                        | 1 | 6 | 11 | 16 | 21 | 29 |
|----------------------------------------|---|---|----|----|----|----|----------------------------------------|---|---|----|----|----|----|
| Treatment-eligible household contact   | 0 | 0 | 0  | 0  | 0  | 0  | Treatment-eligible household contact   | 0 | 0 | 0  | 0  | 0  | 0  |
| Treatment-ineligible household contact | 0 | 0 | 0  | 0  | 0  | 0  | Treatment-ineligible household contact | 0 | 0 | 0  | 0  | 0  | 0  |

### 3.4 Infected Case Population IC-INF

| IFN                                    |                                 |     |     |     |     |     | SOC                                    |                                 |     |     |     |     |     |
|----------------------------------------|---------------------------------|-----|-----|-----|-----|-----|----------------------------------------|---------------------------------|-----|-----|-----|-----|-----|
|                                        | # Visits conducted at study day |     |     |     |     |     |                                        | # Visits conducted at study day |     |     |     |     |     |
|                                        | 1                               | 6   | 11  | 16  | 21  | 29  |                                        | 1                               | 6   | 11  | 16  | 21  | 29  |
| Index case                             | 172                             | 162 | 160 | 159 | 158 | 162 | Index case                             | 169                             | 165 | 165 | 162 | 159 | 165 |
| Treatment-eligible household contact   | 0                               | 0   | 0   | 0   | 0   | 0   | Treatment-eligible household contact   | 0                               | 0   | 0   | 0   | 0   | 0   |
| COVID-positive household contact       | 80                              | 74  | 70  | 67  | 69  | 69  | COVID-positive household contact       | 81                              | 78  | 76  | 72  | 77  | 78  |
| Treatment-ineligible household contact | 0                               | 0   | 0   | 0   | 0   | 0   | Treatment-ineligible household contact | 0                               | 0   | 0   | 0   | 0   | 0   |

### 3.5 Treatment-eligible Household Contact - Intention-to-treat Population EHC-ITT

| IFN                                  |                                 |     |     |     |     |     | SOC                                  |                                 |     |     |     |     |     |
|--------------------------------------|---------------------------------|-----|-----|-----|-----|-----|--------------------------------------|---------------------------------|-----|-----|-----|-----|-----|
|                                      | # Visits conducted at study day |     |     |     |     |     |                                      | # Visits conducted at study day |     |     |     |     |     |
|                                      | 1                               | 6   | 11  | 16  | 21  | 29  |                                      | 1                               | 6   | 11  | 16  | 21  | 29  |
| Index case                           | 0                               | 0   | 0   | 0   | 0   | 0   | Index case                           | 0                               | 0   | 0   | 0   | 0   | 0   |
| Treatment-eligible household contact | 177                             | 171 | 166 | 162 | 163 | 163 | Treatment-eligible household contact | 165                             | 159 | 156 | 154 | 150 | 154 |
| COVID-positive household             | 0                               | 0   | 0   | 0   | 0   | 0   | COVID-positive household             | 0                               | 0   | 0   | 0   | 0   | 0   |

|                                      |   |   |   |   |   |   |                                      |   |   |   |   |   |   |
|--------------------------------------|---|---|---|---|---|---|--------------------------------------|---|---|---|---|---|---|
| Treatment-eligible household contact | 0 | 0 | 0 | 0 | 0 | 0 | Treatment-eligible household contact | 0 | 0 | 0 | 0 | 0 | 0 |
|--------------------------------------|---|---|---|---|---|---|--------------------------------------|---|---|---|---|---|---|

### 3.6 Treatment-eligible Household Contact - Per Protocol Population EHC-PP

| IFN                                    | # Visits conducted at study day |     |     |     |     |     | SOC                                    | # Visits conducted at study day |            |     |     |     |     |
|----------------------------------------|---------------------------------|-----|-----|-----|-----|-----|----------------------------------------|---------------------------------|------------|-----|-----|-----|-----|
|                                        | 1                               | 6   | 11  | 16  | 21  | 29  |                                        | 1                               | 6          | 11  | 16  | 21  | 29  |
|                                        | Index case                      | 0   | 0   | 0   | 0   | 0   |                                        | 0                               | Index case | 0   | 0   | 0   | 0   |
| Treatment-eligible household contact   | 156                             | 156 | 156 | 152 | 154 | 153 | Treatment-eligible household contact   | 165                             | 159        | 156 | 154 | 150 | 154 |
| COVID-positive household contact       | 0                               | 0   | 0   | 0   | 0   | 0   | COVID-positive household contact       | 0                               | 0          | 0   | 0   | 0   | 0   |
| Treatment-ineligible household contact | 0                               | 0   | 0   | 0   | 0   | 0   | Treatment-ineligible household contact | 0                               | 0          | 0   | 0   | 0   | 0   |

### 3.7 Household Contact Population HC

| IFN                                  | # Visits conducted at study day |     |     |     |     |     | SOC                                  | # Visits conducted at study day |            |     |     |     |     |
|--------------------------------------|---------------------------------|-----|-----|-----|-----|-----|--------------------------------------|---------------------------------|------------|-----|-----|-----|-----|
|                                      | 1                               | 6   | 11  | 16  | 21  | 29  |                                      | 1                               | 6          | 11  | 16  | 21  | 29  |
|                                      | Index case                      | 0   | 0   | 0   | 0   | 0   |                                      | 0                               | Index case | 0   | 0   | 0   | 0   |
| Treatment-eligible household contact | 177                             | 171 | 166 | 162 | 163 | 163 | Treatment-eligible household contact | 165                             | 159        | 156 | 154 | 150 | 154 |
| COVID-positive household contact     | 0                               | 0   | 0   | 0   | 0   | 0   | COVID-positive household contact     | 0                               | 0          | 0   | 0   | 0   | 0   |

|                                      |     |     |     |     |     |     |     |     |     |     |     |     |
|--------------------------------------|-----|-----|-----|-----|-----|-----|-----|-----|-----|-----|-----|-----|
| Treatment-eligible household contact | 178 | 173 | 168 | 169 | 166 | 167 | 159 | 144 | 143 | 143 | 140 | 143 |
| ineligible household contact         |     |     |     |     |     |     |     |     |     |     |     |     |

### 3.8 Safety Population

| IFN                                    | # Visits conducted at study day |     |     |     |     |     | SOC                                    | # Visits conducted at study day |            |     |     |     |     |
|----------------------------------------|---------------------------------|-----|-----|-----|-----|-----|----------------------------------------|---------------------------------|------------|-----|-----|-----|-----|
|                                        | 1                               | 6   | 11  | 16  | 21  | 29  |                                        | 1                               | 6          | 11  | 16  | 21  | 29  |
|                                        | Index case                      | 172 | 162 | 160 | 159 | 158 |                                        | 162                             | Index case | 169 | 165 | 165 | 162 |
| Treatment-eligible household contact   | 177                             | 171 | 166 | 162 | 163 | 163 | Treatment-eligible household contact   | 165                             | 159        | 156 | 154 | 150 | 154 |
| COVID-positive household contact       | 80                              | 74  | 70  | 67  | 69  | 69  | COVID-positive household contact       | 81                              | 78         | 76  | 72  | 77  | 78  |
| Treatment-ineligible household contact | 0                               | 0   | 0   | 0   | 0   | 0   | Treatment-ineligible household contact | 0                               | 0          | 0   | 0   | 0   | 0   |

## 4 Withdrawals

### 4.1 Overall

|                            | Days since enrollment |   |   |    |    |    |    |    |    |
|----------------------------|-----------------------|---|---|----|----|----|----|----|----|
|                            | 3                     | 4 | 5 | 10 | 11 | 14 | 15 | 21 | 28 |
| Family withdrew            | 0                     | 0 | 7 | 0  | 0  | 2  | 0  | 0  | 0  |
| Interpersonal problems     | 0                     | 4 | 3 | 0  | 0  | 0  | 0  | 0  | 0  |
| Lack of time               | 0                     | 1 | 0 | 0  | 0  | 0  | 0  | 0  | 0  |
| Other                      | 0                     | 0 | 1 | 0  | 0  | 0  | 0  | 0  | 0  |
| Parental decision          | 0                     | 0 | 2 | 0  | 0  | 0  | 0  | 0  | 0  |
| Poor health                | 0                     | 0 | 1 | 0  | 0  | 1  | 0  | 0  | 0  |
| Sample collection problems | 0                     | 0 | 1 | 0  | 0  | 0  | 0  | 0  | 0  |

|              |   |   |   |   |   |   |   |   |   |
|--------------|---|---|---|---|---|---|---|---|---|
| Uninterested | 0 | 0 | 0 | 1 | 0 | 0 | 0 | 0 | 1 |
| Unspecified  | 4 | 4 | 4 | 2 | 1 | 0 | 1 | 5 | 0 |
| Work         | 0 | 0 | 2 | 2 | 0 | 0 | 0 | 0 | 0 |

## 4.2 By Treatment Arm

| IFN                        | Days since enrollment |   |   |    |    |    |    |    |    |   | SOC                        | Days since enrollment |   |    |    |    |    |    |    |   |  |
|----------------------------|-----------------------|---|---|----|----|----|----|----|----|---|----------------------------|-----------------------|---|----|----|----|----|----|----|---|--|
|                            | 3                     | 4 | 5 | 10 | 11 | 14 | 15 | 21 | 28 | 3 |                            | 4                     | 5 | 10 | 11 | 14 | 15 | 21 | 28 |   |  |
| Family withdrew            | 0                     | 0 | 5 | 0  | 0  | 2  | 0  | 0  | 0  | 0 | Family withdrew            | 0                     | 0 | 2  | 0  | 0  | 0  | 0  | 0  | 0 |  |
| Interpersonal problems     | 0                     | 0 | 3 | 0  | 0  | 0  | 0  | 0  | 0  | 0 | Interpersonal problems     | 0                     | 4 | 0  | 0  | 0  | 0  | 0  | 0  | 0 |  |
| Lack of time               | 0                     | 1 | 0 | 0  | 0  | 0  | 0  | 0  | 0  | 0 | Lack of time               | 0                     | 0 | 0  | 0  | 0  | 0  | 0  | 0  | 0 |  |
| Other                      | 0                     | 0 | 0 | 0  | 0  | 0  | 0  | 0  | 0  | 0 | Other                      | 0                     | 0 | 1  | 0  | 0  | 0  | 0  | 0  | 0 |  |
| Parental decision          | 0                     | 0 | 2 | 0  | 0  | 0  | 0  | 0  | 0  | 0 | Parental decision          | 0                     | 0 | 0  | 0  | 0  | 0  | 0  | 0  | 0 |  |
| Poor health                | 0                     | 0 | 1 | 0  | 0  | 1  | 0  | 0  | 0  | 0 | Poor health                | 0                     | 0 | 0  | 0  | 0  | 0  | 0  | 0  | 0 |  |
| Sample collection problems | 0                     | 0 | 0 | 0  | 0  | 0  | 0  | 0  | 0  | 0 | Sample collection problems | 0                     | 0 | 1  | 0  | 0  | 0  | 0  | 0  | 0 |  |
| Side effects of drug       | 0                     | 0 | 0 | 0  | 0  | 2  | 0  | 0  | 0  | 0 | Side effects of drug       | 0                     | 0 | 0  | 0  | 0  | 0  | 0  | 0  | 0 |  |
| Uninterested               | 0                     | 0 | 0 | 1  | 0  | 0  | 0  | 0  | 1  | 0 | Uninterested               | 0                     | 0 | 0  | 0  | 0  | 0  | 0  | 0  | 0 |  |
| Unspecified                | 4                     | 3 | 1 | 2  | 1  | 0  | 0  | 0  | 0  | 0 | Unspecified                | 0                     | 1 | 3  | 0  | 0  | 0  | 1  | 5  | 0 |  |
| Work                       | 0                     | 0 | 2 | 2  | 0  | 0  | 0  | 0  | 0  | 0 | Work                       | 0                     | 0 | 0  | 0  | 0  | 0  | 0  | 0  | 0 |  |

All participants consented to the use of their collected data.

## 5 Missing Data

No imputation was performed.

## 6 Baseline Characteristics

## 6.1 Full Analysis Population

|                                        | <b>Overall<br/>(N=1172)</b> |
|----------------------------------------|-----------------------------|
| <b>Age (years)</b>                     |                             |
| Mean (SD)                              | 34.1 (19.0)                 |
| <b>Sex</b>                             |                             |
| Female                                 | 617 (52.6%)                 |
| Male                                   | 555 (47.4%)                 |
| <b>Household occupants</b>             |                             |
| Mean (SD)                              | 4.31 (1.73)                 |
| <b>Fully vaccinated for SARS-CoV-2</b> |                             |
| No                                     | 818 (69.8%)                 |
| Yes                                    | 354 (30.2%)                 |
| <b>Cancer</b>                          |                             |
| No                                     | 1157 (98.7%)                |
| Yes                                    | 14 (1.2%)                   |
| Missing                                | 1 (0.1%)                    |
| <b>Diabetes</b>                        |                             |
| No                                     | 1125 (96.0%)                |
| Yes                                    | 46 (3.9%)                   |
| Missing                                | 1 (0.1%)                    |
| <b>Heart disease</b>                   |                             |
| No                                     | 1111 (94.8%)                |
| Yes                                    | 60 (5.1%)                   |
| Missing                                | 1 (0.1%)                    |
| <b>Asthma</b>                          |                             |
| No                                     | 1105 (94.3%)                |
| Yes                                    | 66 (5.6%)                   |
| Missing                                | 1 (0.1%)                    |
| <b>Chronic lung disease</b>            |                             |
| No                                     | 1170 (99.8%)                |
| Yes                                    | 1 (0.1%)                    |
| Missing                                | 1 (0.1%)                    |
| <b>Chronic kidney disease</b>          |                             |
| No                                     | 1168 (99.7%)                |
| Yes                                    | 3 (0.3%)                    |
| Missing                                | 1 (0.1%)                    |
| <b>Chronic neurological disease</b>    |                             |
| No                                     | 1164 (99.3%)                |
| Yes                                    | 7 (0.6%)                    |
| Missing                                | 1 (0.1%)                    |
| <b>Smoker</b>                          |                             |
| No                                     | 1021 (87.1%)                |
| Yes                                    | 151 (12.9%)                 |

## 6.2 IC-ITT Population

|                    | <b>SOC<br/>(N=169)</b> | <b>IFN<br/>(N=172)</b> |
|--------------------|------------------------|------------------------|
| <b>Age (years)</b> |                        |                        |

|                                        |             |             |
|----------------------------------------|-------------|-------------|
| <b>Sex</b>                             |             |             |
| Female                                 | 82 (48.5%)  | 79 (45.9%)  |
| Male                                   | 87 (51.5%)  | 93 (54.1%)  |
| <b>Household occupants</b>             |             |             |
| Mean (SD)                              | 3.74 (1.29) | 3.90 (1.64) |
| <b>Fully vaccinated for SARS-CoV-2</b> |             |             |
| No                                     | 106 (62.7%) | 116 (67.4%) |
| Yes                                    | 63 (37.3%)  | 56 (32.6%)  |
| <b>Cancer</b>                          |             |             |
| No                                     | 166 (98.2%) | 169 (98.3%) |
| Yes                                    | 3 (1.8%)    | 3 (1.7%)    |
| <b>Diabetes</b>                        |             |             |
| No                                     | 162 (95.9%) | 163 (94.8%) |
| Yes                                    | 7 (4.1%)    | 9 (5.2%)    |
| <b>Heart disease</b>                   |             |             |
| No                                     | 158 (93.5%) | 165 (95.9%) |
| Yes                                    | 11 (6.5%)   | 7 (4.1%)    |
| <b>Asthma</b>                          |             |             |
| No                                     | 157 (92.9%) | 167 (97.1%) |
| Yes                                    | 12 (7.1%)   | 5 (2.9%)    |
| <b>Chronic lung disease</b>            |             |             |
| No                                     | 169 (100%)  | 172 (100%)  |
| Yes                                    | 0 (0%)      | 0 (0%)      |
| <b>Chronic kidney disease</b>          |             |             |
| No                                     | 169 (100%)  | 172 (100%)  |
| Yes                                    | 0 (0%)      | 0 (0%)      |
| <b>Chronic neurological disease</b>    |             |             |
| No                                     | 169 (100%)  | 172 (100%)  |
| Yes                                    | 0 (0%)      | 0 (0%)      |
| <b>Smoker</b>                          |             |             |
| No                                     | 147 (87.0%) | 138 (80.2%) |
| Yes                                    | 22 (13.0%)  | 34 (19.8%)  |

## 6.3 IC-INF Population

|                                        | <b>SOC<br/>(N=250)</b> | <b>IFN<br/>(N=252)</b> |
|----------------------------------------|------------------------|------------------------|
| <b>Age (years)</b>                     |                        |                        |
| Mean (SD)                              | 42.2 (13.1)            | 40.5 (13.5)            |
| <b>Sex</b>                             |                        |                        |
| Female                                 | 129 (51.6%)            | 117 (46.4%)            |
| Male                                   | 121 (48.4%)            | 135 (53.6%)            |
| <b>Household occupants</b>             |                        |                        |
| Mean (SD)                              | 3.83 (1.28)            | 3.98 (1.65)            |
| <b>Fully vaccinated for SARS-CoV-2</b> |                        |                        |
| No                                     | 158 (63.2%)            | 170 (67.5%)            |
| Yes                                    | 92 (36.8%)             | 82 (32.5%)             |
| <b>Cancer</b>                          |                        |                        |
| No                                     | 246 (98.4%)            | 248 (98.4%)            |
| Yes                                    | 4 (1.6%)               | 4 (1.6%)               |

|                                     |             |             |
|-------------------------------------|-------------|-------------|
| No                                  | 237 (94.8%) | 237 (94.0%) |
| Yes                                 | 13 (5.2%)   | 15 (6.0%)   |
| <b>Heart disease</b>                |             |             |
| No                                  | 232 (92.8%) | 236 (93.7%) |
| Yes                                 | 18 (7.2%)   | 16 (6.3%)   |
| <b>Asthma</b>                       |             |             |
| No                                  | 230 (92.0%) | 239 (94.8%) |
| Yes                                 | 20 (8.0%)   | 13 (5.2%)   |
| <b>Chronic lung disease</b>         |             |             |
| No                                  | 250 (100%)  | 252 (100%)  |
| Yes                                 | 0 (0%)      | 0 (0%)      |
| <b>Chronic kidney disease</b>       |             |             |
| No                                  | 250 (100%)  | 252 (100%)  |
| Yes                                 | 0 (0%)      | 0 (0%)      |
| <b>Chronic neurological disease</b> |             |             |
| No                                  | 249 (99.6%) | 251 (99.6%) |
| Yes                                 | 1 (0.4%)    | 1 (0.4%)    |
| <b>Smoker</b>                       |             |             |
| No                                  | 215 (86.0%) | 205 (81.3%) |
| Yes                                 | 35 (14.0%)  | 47 (18.7%)  |

## 6.4 EHC-ITT Population

|                                        | <b>SOC<br/>(N=165)</b> | <b>IFN<br/>(N=177)</b> |
|----------------------------------------|------------------------|------------------------|
| <b>Age (years)</b>                     |                        |                        |
| Mean (SD)                              | 41.6 (15.5)            | 38.0 (14.8)            |
| <b>Sex</b>                             |                        |                        |
| Female                                 | 93 (56.4%)             | 107 (60.5%)            |
| Male                                   | 72 (43.6%)             | 70 (39.5%)             |
| <b>Household occupants</b>             |                        |                        |
| Mean (SD)                              | 4.00 (1.37)            | 4.54 (2.18)            |
| <b>Fully vaccinated for SARS-CoV-2</b> |                        |                        |
| No                                     | 80 (48.5%)             | 107 (60.5%)            |
| Yes                                    | 85 (51.5%)             | 70 (39.5%)             |
| <b>Cancer</b>                          |                        |                        |
| No                                     | 165 (100%)             | 176 (99.4%)            |
| Yes                                    | 0 (0%)                 | 1 (0.6%)               |
| <b>Diabetes</b>                        |                        |                        |
| No                                     | 160 (97.0%)            | 169 (95.5%)            |
| Yes                                    | 5 (3.0%)               | 8 (4.5%)               |
| <b>Heart disease</b>                   |                        |                        |
| No                                     | 160 (97.0%)            | 170 (96.0%)            |
| Yes                                    | 5 (3.0%)               | 7 (4.0%)               |
| <b>Asthma</b>                          |                        |                        |
| No                                     | 157 (95.2%)            | 170 (96.0%)            |
| Yes                                    | 8 (4.8%)               | 7 (4.0%)               |
| <b>Chronic lung disease</b>            |                        |                        |
| No                                     | 165 (100%)             | 177 (100%)             |
| Yes                                    | 0 (0%)                 | 0 (0%)                 |



|                                     |             |             |
|-------------------------------------|-------------|-------------|
| No                                  | 165 (100%)  | 177 (100%)  |
| Yes                                 | 0 (0%)      | 0 (0%)      |
| <b>Chronic neurological disease</b> |             |             |
| No                                  | 165 (100%)  | 175 (98.9%) |
| Yes                                 | 0 (0%)      | 2 (1.1%)    |
| <b>Smoker</b>                       |             |             |
| No                                  | 140 (84.8%) | 145 (81.9%) |
| Yes                                 | 25 (15.2%)  | 32 (18.1%)  |

## 6.5 HC Population

|                                        | <b>SOC<br/>(N=315)</b> | <b>IFN<br/>(N=355)</b> |
|----------------------------------------|------------------------|------------------------|
| <b>Age (years)</b>                     |                        |                        |
| Mean (SD)                              | 29.3 (21.5)            | 28.0 (20.2)            |
| <b>Sex</b>                             |                        |                        |
| Female                                 | 165 (52.4%)            | 206 (58.0%)            |
| Male                                   | 150 (47.6%)            | 149 (42.0%)            |
| <b>Household occupants</b>             |                        |                        |
| Mean (SD)                              | 4.31 (1.29)            | 4.89 (2.18)            |
| <b>Fully vaccinated for SARS-CoV-2</b> |                        |                        |
| No                                     | 222 (70.5%)            | 268 (75.5%)            |
| Yes                                    | 93 (29.5%)             | 87 (24.5%)             |
| <b>Cancer</b>                          |                        |                        |
| No                                     | 313 (99.4%)            | 350 (98.6%)            |
| Yes                                    | 1 (0.3%)               | 5 (1.4%)               |
| Missing                                | 1 (0.3%)               | 0 (0%)                 |
| <b>Diabetes</b>                        |                        |                        |
| No                                     | 305 (96.8%)            | 346 (97.5%)            |
| Yes                                    | 9 (2.9%)               | 9 (2.5%)               |
| Missing                                | 1 (0.3%)               | 0 (0%)                 |
| <b>Heart disease</b>                   |                        |                        |
| No                                     | 301 (95.6%)            | 342 (96.3%)            |
| Yes                                    | 13 (4.1%)              | 13 (3.7%)              |
| Missing                                | 1 (0.3%)               | 0 (0%)                 |
| <b>Asthma</b>                          |                        |                        |
| No                                     | 294 (93.3%)            | 342 (96.3%)            |
| Yes                                    | 20 (6.3%)              | 13 (3.7%)              |
| Missing                                | 1 (0.3%)               | 0 (0%)                 |
| <b>Chronic lung disease</b>            |                        |                        |
| No                                     | 314 (99.7%)            | 354 (99.7%)            |
| Yes                                    | 0 (0%)                 | 1 (0.3%)               |
| Missing                                | 1 (0.3%)               | 0 (0%)                 |
| <b>Chronic kidney disease</b>          |                        |                        |
| No                                     | 314 (99.7%)            | 352 (99.2%)            |
| Yes                                    | 0 (0%)                 | 3 (0.8%)               |
| Missing                                | 1 (0.3%)               | 0 (0%)                 |
| <b>Chronic neurological disease</b>    |                        |                        |
| No                                     | 313 (99.4%)            | 351 (98.9%)            |
| Yes                                    | 1 (0.3%)               | 4 (1.1%)               |

| Smoker |             |             |
|--------|-------------|-------------|
| No     | 287 (91.1%) | 314 (88.5%) |
| Yes    | 28 (8.9%)   | 41 (11.5%)  |

## 7 Primary Analyses SAP 6.10

### 7.1 Primary Analysis 1 SAP 6.10.1

#### 7.1.1 Main Analysis

This corresponds to SAP section 6.10.1 (Primary Analysis 1). Primary analysis 1 is carried out on participants from the IC-INF population, to compare the probability of index cases being SARS-CoV-2 negative vs positive per saliva PCR on the study day 11 saliva sample (“Not Shedding vs. Shedding”) in either the treatment or soc arm of the study.

A total of 468 participants were used in this analysis.

| Covariate     | OR    | 95% CI           |
|---------------|-------|------------------|
| Intercept     | 0.199 | [0.0284, 0.8756] |
| Age (bin 2)   | 1.519 | [ 0.342, 10.616] |
| Age (bin 3)   | 1.129 | [0.254, 7.891]   |
| Age (bin 4)   | 1.504 | [ 0.336, 10.552] |
| Male          | 2.138 | [1.414, 3.263]   |
| IFN treatment | 0.979 | [0.647, 1.479]   |

#### 7.1.2 Supporting Analyses

##### 7.1.2.1 Absolute Risk per Treatment Arm

A total of 468 participants were used in this analysis.

| Treatment | N   | AR    | ARR      | 95% CI            |
|-----------|-----|-------|----------|-------------------|
| SOC       | 237 | 0.287 |          |                   |
| IFN       | 225 | 0.289 | -0.00197 | [-0.0846, 0.0806] |

##### 7.1.2.2 GLM with a Log Link

A total of 468 participants were used in this analysis.

This analysis did not converge.

#### 7.1.3 Sensitivity Analyses

A total of 468 participants were used in this analysis.

| Covariate     | OR    | 95% CI           |
|---------------|-------|------------------|
| Intercept     | 0.202 | [0.0289, 0.8893] |
| Age (bin 2)   | 1.654 | [0.372, 11.570]  |
| Age (bin 3)   | 1.352 | [0.302, 9.494]   |
| Age (bin 4)   | 1.884 | [0.416, 13.333]  |
| Male          | 2.119 | [1.398, 3.241]   |
| Vaccinated    | 0.604 | [0.376, 0.956]   |
| IFN treatment | 0.963 | [0.635, 1.459]   |

### 7.1.3.2 IC-ITT Population

This corresponds to SAP section 6.10.1 (sensitivity analysis B). Sensitivity analysis B is carried out on participants from the IC-ITT population.

A total of 323 participants were used in this analysis.

| Covariate     | OR    | 95% CI             |
|---------------|-------|--------------------|
| Intercept     | 0.115 | [0.00566, 0.81281] |
| Age (bin 2)   | 1.961 | [0.284, 39.261]    |
| Age (bin 3)   | 1.272 | [0.184, 25.425]    |
| Age (bin 4)   | 2.453 | [0.351, 49.321]    |
| Male          | 2.224 | [1.315, 3.833]     |
| IFN treatment | 1.106 | [0.657, 1.863]     |

### 7.1.3.3 IC-PP Population

This corresponds to SAP section 6.10.1 (sensitivity analysis C). Sensitivity analysis C is carried out on participants from the IC-PP population (excluding participants randomized to the IFN arm that received <3 doses; shown below).

A total of 310 participants were used in this analysis.

| Covariate   | OR    | 95% CI          |
|-------------|-------|-----------------|
| Intercept   | 0.122 | [0.006, 0.865]  |
| Age (bin 2) | 1.935 | [0.280, 38.738] |
| Age (bin 3) | 1.178 | [0.169, 23.638] |
| Age (bin 4) | 2.361 | [0.337, 47.531] |

IFN treatment 1.062 [0.622, 1.810]

## 7.1.4 Unplanned Analyses

### 7.1.4.1 Adjusted for Days between Symptom Onset and Visit

A total of 468 participants were used in this analysis.

This is an unplanned analysis. Days between symptom onset and visit date was included as a covariate.

| Covariate                                 | OR    | 95% CI           |
|-------------------------------------------|-------|------------------|
| Intercept                                 | 0.294 | [0.0246, 2.7823] |
| Age (bin 2)                               | 1.519 | [ 0.342, 10.629] |
| Age (bin 3)                               | 1.138 | [0.256, 7.959]   |
| Age (bin 4)                               | 1.539 | [ 0.343, 10.807] |
| Male                                      | 2.114 | [1.397, 3.229]   |
| Days between symptom onset and visit date | 0.973 | [0.866, 1.090]   |
| IFN treatment                             | 0.987 | [0.652, 1.494]   |

### 7.1.4.2 Excluding PCR Negative Index cases

A total of 427 participants were used in this analysis.

This is an unplanned analysis. Index cases that were PCR negative at both study day 1 and study day 6 were excluded.

| Covariate     | OR    | 95% CI           |
|---------------|-------|------------------|
| Intercept     | 0.208 | [0.0298, 0.9172] |
| Age (bin 2)   | 1.771 | [ 0.398, 12.384] |
| Age (bin 3)   | 1.151 | [0.259, 8.044]   |
| Age (bin 4)   | 1.573 | [ 0.352, 11.037] |
| Male          | 2.071 | [1.350, 3.209]   |
| IFN treatment | 0.938 | [0.612, 1.436]   |

Below, I repeat the above, excluding *households* where the index case was PCR negative at both study day 1 and 6.

| Covariate   | OR    | 95% CI           |
|-------------|-------|------------------|
| Intercept   | 0.229 | [0.0319, 1.0685] |
| Age (bin 2) | 1.708 | [ 0.364, 12.208] |
| Age (bin 3) | 1.227 | [0.260, 8.789]   |

|               |       |                |
|---------------|-------|----------------|
| Age (bin 1)   | 1.798 | [0.97, 2.99]   |
| Male          | 2.128 | [1.383, 3.307] |
| Vaccinated    | 0.573 | [0.349, 0.924] |
| IFN treatment | 0.953 | [0.619, 1.466] |

## 7.2 Primary Analysis 2 SAP 6.10.2

### 7.2.1 Main Analysis

This corresponds to SAP section 6.10.2 (primary analysis 2). Primary analysis 2 is carried out on participants from the EHC-ITT population, to compare the probability of eligible household contacts being SARS-CoV-2 negative vs positive per saliva PCR on study day 11 (“Not Shedding vs. Shedding”) in either the treatment or soc arm of the study.

A total of 322 participants were used in this analysis.

| Covariate     | OR    | 95% CI           |
|---------------|-------|------------------|
| Intercept     | 0.505 | [0.120, 2.129]   |
| Age (bin 2)   | 0.749 | [0.190, 2.948]   |
| Age (bin 3)   | 0.276 | [0.063, 1.214]   |
| Age (bin 4)   | 0.195 | [0.0411, 0.9215] |
| Male          | 0.755 | [0.357, 1.598]   |
| IFN treatment | 0.582 | [0.271, 1.247]   |

### 7.2.2 Supporting Analyses

#### 7.2.2.1 Absolute Risk per Treatment Arm

A total of 322 participants were used in this analysis.

| Treatment | N   | AR    | ARR    | 95% CI          |
|-----------|-----|-------|--------|-----------------|
| SOC       | 156 | 0.154 |        |                 |
| IFN       | 165 | 0.115 | 0.0387 | [-0.036, 0.113] |

#### 7.2.2.2 GLMM with a Log Link

A total of 322 participants were used in this analysis.

This analysis did not converge.

### 7.2.3 Sensitivity Analyses

#### 7.2.3.1 Adjusted for Risk Factors

A total of 322 participants were used in this analysis.

| Covariate                                   | OR      | 95% CI               |
|---------------------------------------------|---------|----------------------|
| Intercept                                   | 0.00983 | [0.000358, 0.269579] |
| Age (bin 2)                                 | 1.04996 | [0.193, 5.718]       |
| Age (bin 3)                                 | 0.37843 | [0.055, 2.605]       |
| Age (bin 4)                                 | 0.28665 | [0.0384, 2.1416]     |
| Male                                        | 0.84879 | [0.353, 2.039]       |
| Participated in any chores (study day 1-11) | 1.24159 | [0.252, 6.112]       |
| Vaccinated                                  | 0.98930 | [0.378, 2.586]       |
| Seropositive at baseline                    | 0.36852 | [0.0885, 1.5344]     |
| # Household occupants / # bedrooms          | 1.42006 | [0.578, 3.491]       |
| Household positivity rate                   | 7.70447 | [0.618, 95.992]      |
| Log10(Baseline viral load of index case)    | 1.53349 | [1.077, 2.183]       |
| IFN treatment                               | 0.49202 | [0.202, 1.199]       |

### 7.2.3.2 HC Population

A total of 633 participants were used in this analysis.

| Covariate     | OR    | 95% CI           |
|---------------|-------|------------------|
| Intercept     | 0.194 | [0.0679, 0.5543] |
| armNE         | 2.274 | [0.917, 5.640]   |
| Age (bin 2)   | 1.432 | [0.499, 4.109]   |
| Age (bin 3)   | 0.883 | [0.292, 2.665]   |
| Age (bin 4)   | 0.314 | [0.105, 0.941]   |
| Male          | 0.818 | [0.464, 1.443]   |
| IFN treatment | 0.577 | [0.287, 1.160]   |

### 7.2.3.3 EHC-PP Population

A total of 312 participants were used in this analysis.

| Covariate   | OR    | 95% CI           |
|-------------|-------|------------------|
| Intercept   | 0.574 | [0.133, 2.487]   |
| Age (bin 2) | 0.670 | [0.166, 2.705]   |
| Age (bin 3) | 0.257 | [0.0572, 1.1555] |
| Age (bin 4) | 0.174 | [0.0359, 0.8411] |

IFN treatment 0.589 [0.272, 1.276]

## 7.2.4 Unplanned Analyses

### 7.2.4.1 Adjusted for Days between Symptom Onset and Visit

A total of 322 participants were used in this analysis.

This is an unplanned analysis. Days between symptom onset *of the index case* and visit date was included as a covariate. The analysis did not converge.

## 8 Secondary Analyses

### 8.1 Secondary Analysis 1 SAP 6.10.3

This corresponds to SAP section 6.10.3 (secondary analysis 1). This analysis is carried out on the IC-INF population, using discrete time survival analysis to assess whether IFN treatment has an effect on the duration for which participants had SARS-CoV-2 positive saliva PCR.

Note that a higher hazard ratio is better, as it indicates a faster time to discharge from hospital.

#### 8.1.1 Main Analysis

A total of 502 participants (totalling 2807 visits) were used in this analysis.

| Covariate             | HR    | 95% CI         |
|-----------------------|-------|----------------|
| Intercept             | 0.286 | [0.179, 0.443] |
| Age (bin 2)           | 0.836 | [0.540, 1.330] |
| Age (bin 3)           | 0.799 | [0.517, 1.271] |
| Age (bin 4)           | 0.833 | [0.537, 1.327] |
| Male                  | 0.818 | [0.728, 0.918] |
| Days since enrollment | 1.110 | [1.102, 1.118] |
| IFN treatment         | 1.083 | [0.964, 1.217] |

#### 8.1.2 Sensitivity Analyses

##### 8.1.2.1 IC-ITT Population

A total of 341 participants (totalling 1927 visits) were used in this analysis.

| Covariate | HR | 95% CI |
|-----------|----|--------|
|-----------|----|--------|

|                       |       |                |
|-----------------------|-------|----------------|
| Age (bin 2)           | 0.830 | [0.491, 1.460] |
| Age (bin 3)           | 0.800 | [0.474, 1.405] |
| Age (bin 4)           | 0.686 | [0.403, 1.213] |
| Male                  | 0.888 | [0.773, 1.021] |
| Days since enrollment | 1.108 | [1.099, 1.118] |
| IFN treatment         | 1.018 | [0.886, 1.171] |

### 8.1.2.2 IC-PP Population

A total of 315 participants (totalling 1830 visits) were used in this analysis.

| Covariate             | HR    | 95% CI         |
|-----------------------|-------|----------------|
| Intercept             | 0.341 | [0.192, 0.580] |
| Age (bin 2)           | 0.839 | [0.497, 1.471] |
| Age (bin 3)           | 0.816 | [0.484, 1.431] |
| Age (bin 4)           | 0.692 | [0.407, 1.223] |
| Male                  | 0.909 | [0.789, 1.048] |
| Days since enrollment | 1.106 | [1.096, 1.115] |
| IFN treatment         | 1.026 | [0.890, 1.183] |

## 8.2 Secondary Analysis 2 SAP 6.10.4

This corresponds to SAP section 6.10.4 (secondary analysis 2). This analysis is carried out on participants from the HC population.

### 8.2.1 Main Analysis

#### 8.2.1.1 Incidence of SARS-CoV-2 Positive Saliva PCR on Study Day 1

The HC population consists of only household contacts that were PCR negative at visit 1, so this comparison is not applicable.

#### 8.2.1.2 Incidence of SARS-CoV-2 Positive Saliva PCR on Study Day 11

A total of 633 participants were used in this analysis.

| Incidence (SOC) | Incidence (IFN) | Cochran-Mantel-Haenszel p-value |
|-----------------|-----------------|---------------------------------|
| 0.208           | 0.173           | 0.329                           |

#### 8.2.1.3 Seroconversion at Study Day 29

A total of 594 participants were used in this analysis.



This analysis is comparing the proportion of seropositive participants at study day 29, stratified by baseline immune status.

| Incidence (SOC) | Incidence (IFN) | Cochran-Mantel-Haenszel p-value |
|-----------------|-----------------|---------------------------------|
| 0.537           | 0.415           | 0.0558                          |

## 8.3 Secondary Analysis 3 SAP 6.10.5

This corresponds to SAP section 6.10.5 (secondary analysis 3). This analysis is carried out on participants from the IC-ITT population.

For this analysis, households with size greater than 8 were combined with the households of size 8, as there were not many of the former.

### 8.3.1 Main Analysis

#### 8.3.1.1 Incidence of Hospitalization Due to COVID-19

A total of 299 participants were used in this analysis.

| Outcome      | Overall incidence in SOC | Overall incidence in IFN | Cochran-Mantel-Haenszel p-value |
|--------------|--------------------------|--------------------------|---------------------------------|
| Hospitalized | 0.101                    | 0.0938                   | 0.820                           |

#### 8.3.1.2 Incidence of Death Due to COVID-19

No deaths occurred in this analysis population.

#### 8.3.1.3 Incidence of Hospitalization and/or Death Due to COVID-19

As there were no deaths in this analysis population, the results are the same as “Incidence of Hospitalization Due to COVID-19”.

#### 8.3.1.4 Duration of Hospital Stay Due to COVID-19

A total of 29 participants were used in this analysis.

As there were no deaths in this analysis population, a Cox proportional-hazards model was used instead. Note that a higher hazard ratio is better, in this case, as it indicates a faster discharge from the hospital.

| Covariate | HR    | 95% CI         |
|-----------|-------|----------------|
| IFN       | 0.522 | [0.237, 1.152] |

### 8.3.2 Sensitivity Analyses

#### 8.3.2.1 IC-INF Population

##### 8.3.2.1.1 Incidence of Hospitalization Due to COVID-19

A total of 437 participants were used in this analysis.

| Outcome      | Overall incidence in SOC | Overall incidence in IFN | Cochran-Mantel-Haenszel p-value |
|--------------|--------------------------|--------------------------|---------------------------------|
| Hospitalized | 0.109                    | 0.0929                   | 0.570                           |

### 8.3.2.1.2 Incidence of Death Due to COVID-19

No deaths occurred in this analysis population.

### 8.3.2.1.3 Incidence of Hospitalization and/or Death Due to COVID-19

As there were no deaths in this analysis population, the results are the same as “Incidence of Hospitalization Due to COVID-19”.

### 8.3.2.1.4 Duration of Hospital Stay Due to COVID-19

A total of 43 participants were used in this analysis.

As there were no deaths in this analysis population, a Cox proportional-hazards model was used instead. Note that a higher hazard ratio is better, in this case, as it indicates a faster discharge from the hospital.

| Covariate | HR    | 95% CI         |
|-----------|-------|----------------|
| IFN       | 0.452 | [0.233, 0.877] |

**Note discrepancy in number of hospitalizations reported (n = 44 vs. 43 reported) is caused by 1 participant where hospital duration could not be derived (CE 183 04 - no discharge date)**

### 8.3.2.2 IC-PP Population

#### 8.3.2.2.1 Incidence of Hospitalization Due to COVID-19

A total of 275 participants were used in this analysis.

| Outcome      | Overall incidence in SOC | Overall incidence in IFN | Cochran-Mantel-Haenszel p-value |
|--------------|--------------------------|--------------------------|---------------------------------|
| Hospitalized | 0.101                    | 0.0294                   | 0.0312                          |

### 8.3.2.2.2 Incidence of Death Due to COVID-19

No deaths occurred in this analysis population.

### 8.3.2.2.3 Incidence of Hospitalization and/or Death Due to COVID-19

As there were no deaths in this analysis population, the results are the same as “Incidence of Hospitalization Due to COVID-19”.

### 8.3.2.2.4 Duration of Hospital Stay Due to COVID-19

A total of 18 participants were used in this analysis.

As there were no deaths in this analysis population, a Cox proportional-hazards model was used instead. Note that a higher hazard ratio is better, in this case, as it indicates a faster discharge from the hospital.

IFN 2.006 [0.601, 6.690]

## 8.4 Secondary Analysis 4 SAP 6.10.6

### 8.4.1 Main Analysis

A total of 844 participants (totalling 6784 visits) were used in this analysis.

#### 8.4.1.1 Incidence of Adverse Events

| Treatment | Rate of AE per participant | Incidence of any AE | Fisher's exact test |
|-----------|----------------------------|---------------------|---------------------|
| SOC       | 1.824                      | 0.280               |                     |
| IFN       | 2.117                      | 0.235               | 0.156               |

#### 8.4.1.2 Incidence of Adverse Events Related To Treatment

| Treatment | Rate of related AE per participant | Incidence of any related AE | Fisher's exact test |
|-----------|------------------------------------|-----------------------------|---------------------|
| SOC       | 0.00964                            | 0.00964                     |                     |
| IFN       | 0.287                              | 0.235                       | 2.31e-27            |

#### 8.4.1.3 Incidence of Serious Adverse Events

| Treatment | Rate of SAE per participant | Incidence of any SAE | Fisher's exact test |
|-----------|-----------------------------|----------------------|---------------------|
| SOC       | 0.0627                      | 0.0578               |                     |
| IFN       | 0.0559                      | 0.0559               | 1.000               |

## 9 Safety Analysis SAP 6.11

See Secondary Analysis 4.

## 10 Additional Analyses SAP 6.12

### 10.1 Dose-response and Recovery SAP 6.12.1

|         | PCR negative at study day 11 | PCR positive at study day 11 |
|---------|------------------------------|------------------------------|
| 1 dose  | 3                            | 1                            |
| 2 doses | 5                            | 3                            |
| 3 doses | 109                          | 37                           |

The p-value for the Fisher's exact test is 0.756.

## 10.2 Dose-response and Transmission SAP 6.12.2

|         | PCR negative at study day 11 | PCR positive at study day 11 |
|---------|------------------------------|------------------------------|
| 1 dose  | 6                            | 0                            |
| 2 doses | 3                            | 1                            |
| 3 doses | 137                          | 18                           |

The p-value for the Fisher's exact test is 0.481.

## 10.3 Viral Load SAP 6.12.3

Growth rate is undefined (i.e. is missing) for participants whose peak viral load occurred on study day 1. Duration of infection is undefined for participants whose last PCR result was positive. Decay is undefined for participants if their duration of infection is undefined.

|                                | SOC<br>(N=209)              | IFN<br>(N=209)              |
|--------------------------------|-----------------------------|-----------------------------|
| <b>Peak viral load</b>         |                             |                             |
| Mean (SD)                      | 28,913,933 (196,793,258)    | 6,591,476 (33,775,900)      |
| 95% CI                         | [-364,672,583; 422,500,449] | [-60,960,324; 74,143,277]   |
| Median [Q1; Q3]                | 220,461 [28,079; 1,741,659] | 220,461 [32,374; 1,411,196] |
| <b>Days to peak viral load</b> |                             |                             |
| Mean (SD)                      | 1.87 (4.52)                 | 1.40 (3.02)                 |
| 95% CI                         | [-7.17; 10.92]              | [-4.64; 7.44]               |
| Median [Q1; Q3]                | 0.00 [0.00; 0.00]           | 0.00 [0.00; 0.00]           |
| <b>Growth rate</b>             |                             |                             |
| Mean (SD)                      | 262,111 (951,800)           | 431,891 (1,431,385)         |
| 95% CI                         | [-1,641,490; 2,165,711]     | [-2,430,878; 3,294,661]     |
| Median [Q1; Q3]                | 15,083 [2,003; 100,240]     | 4,747 [456; 40,673]         |
| Missing                        | 163 (78.0%)                 | 163 (78.0%)                 |
| <b>Duration of infection</b>   |                             |                             |
| Mean (SD)                      | 8.88 (6.89)                 | 8.38 (6.29)                 |
| 95% CI                         | [-4.90; 22.66]              | [-4.19; 20.95]              |
| Median [Q1; Q3]                | 6.00 [1.00; 16.00]          | 6.00 [6.00; 11.00]          |
| Missing                        | 31 (14.8%)                  | 26 (12.4%)                  |
| <b>Decay rate</b>              |                             |                             |
| Mean (SD)                      | 1,376,272 (4,574,811)       | 948,980 (4,379,841)         |
| 95% CI                         | [-7,773,350; 10,525,894]    | [-7,810,702; 9,708,662]     |
| Median [Q1; Q3]                | 58,102 [10,146; 294,797]    | 43,171 [11,186; 268,371]    |
| Missing                        | 33 (15.8%)                  | 26 (12.4%)                  |
| <b>Area under the curve</b>    |                             |                             |
| Mean (SD)                      | 75,272,876 (494,951,264)    | 19,688,768 (91,915,780)     |

|                            |                              |                              |
|----------------------------|------------------------------|------------------------------|
| Median [Q1; Q3]            | 698,934 [103,353; 6,628,988] | 782,976 [127,664; 3,900,093] |
| Missing                    | 2 (1.0%)                     | 0 (0%)                       |
| <b>Baseline viral load</b> |                              |                              |
| Mean (SD)                  | 28,590,599 (196,824,913)     | 6,090,935 (33,614,342)       |
| 95% CI                     | [-365,059,226; 422,240,425]  | [-61,137,749; 73,319,620]    |
| Median [Q1; Q3]            | 144,737 [10,562; 1,270,280]  | 133,549 [18,435; 870,885]    |

Repeat including p-values for the comparisons between the groups (Wilcoxon Rank Sum Test).

|                                | SOC<br>(N=209)                | IFN<br>(N=209)               | p     |
|--------------------------------|-------------------------------|------------------------------|-------|
| <b>Peak viral load</b>         |                               |                              |       |
| Mean (SD)                      | 28,913,933 (196,793,258)      | 6,591,476 (33,775,900)       | 0.761 |
| 95% CI                         | [-364,672,583; 422,500,449]   | [-60,960,324; 74,143,277]    |       |
| Median [Q1; Q3]                | 220,461 [28,079; 1,741,659]   | 220,461 [32,374; 1,411,196]  |       |
| <b>Days to peak viral load</b> |                               |                              |       |
| Mean (SD)                      | 1.87 (4.52)                   | 1.40 (3.02)                  | 0.855 |
| 95% CI                         | [-7.17; 10.92]                | [-4.64; 7.44]                |       |
| Median [Q1; Q3]                | 0.00 [0.00; 0.00]             | 0.00 [0.00; 0.00]            |       |
| <b>Growth rate</b>             |                               |                              |       |
| Mean (SD)                      | 262,111 (951,800)             | 431,891 (1,431,385)          | 0.416 |
| 95% CI                         | [-1,641,490; 2,165,711]       | [-2,430,878; 3,294,661]      |       |
| Median [Q1; Q3]                | 15,083 [2,003; 100,240]       | 4,747 [456; 40,673]          |       |
| <b>Duration of infection</b>   |                               |                              |       |
| Mean (SD)                      | 8.88 (6.89)                   | 8.38 (6.29)                  | 0.618 |
| 95% CI                         | [-4.90; 22.66]                | [-4.19; 20.95]               |       |
| Median [Q1; Q3]                | 6.00 [1.00; 16.00]            | 6.00 [6.00; 11.00]           |       |
| <b>Decay rate</b>              |                               |                              |       |
| Mean (SD)                      | 1,376,272 (4,574,811)         | 948,980 (4,379,841)          | 0.59  |
| 95% CI                         | [-7,773,350; 10,525,894]      | [-7,810,702; 9,708,662]      |       |
| Median [Q1; Q3]                | 58,102 [10,146; 294,797]      | 43,171 [11,186; 268,371]     |       |
| <b>Area under the curve</b>    |                               |                              |       |
| Mean (SD)                      | 75,272,876 (494,951,264)      | 19,688,768 (91,915,780)      | 0.856 |
| 95% CI                         | [-914,629,653; 1,065,175,405] | [-164,142,792; 203,520,328]  |       |
| Median [Q1; Q3]                | 698,934 [103,353; 6,628,988]  | 782,976 [127,664; 3,900,093] |       |
| <b>Baseline viral load</b>     |                               |                              |       |
| Mean (SD)                      | 28,590,599 (196,824,913)      | 6,090,935 (33,614,342)       | 0.883 |
| 95% CI                         | [-365,059,226; 422,240,425]   | [-61,137,749; 73,319,620]    |       |
| Median [Q1; Q3]                | 144,737 [10,562; 1,270,280]   | 133,549 [18,435; 870,885]    |       |

## 11 Optional Analyses

### 11.1 Bayesian Analysis

## 11.2 Exploratory Two-period Generalized Mixed Effects Model

This analysis is detailed in a separate document.

## **Containing Coronavirus Disease 19 Trial (CONCORD-19): Exploratory Analyses**

# Containing Coronavirus Disease 19 Trial (CONCORD-19)

Exploratory analysis, two-period glmer to explore treatment effect during and after treatment period in study-eligible and ineligible household contacts.

---

Casey P. Shannon (PROOF Centre of Excellence, University of British Columbia) , true , Robert Balshaw (Centre for Healthcare Innovation, University of Manitoba)  
2022-05-19

---

## Introduction

Primary analysis 2 was carried out on participants from the EHC-ITT population, to compare the probability of eligible household contacts being SARS-CoV-2 negative vs positive per saliva PCR on study day 11 ("Not Shedding vs. Shedding") in either the treatment or soc arm of the study.

A planned sensitivity analysis adjusting for various risk factors had promising results (reduction of risk in the IFN arm), though this effect did not reach the pre-specified statistical significance threshold.

**Here we revisit primary analysis 2, adopting a slightly modified approach incorporating treatment periods, and additionally considering non-eligible household contacts.**



## 1. New outcome measure

Rather than counting participants as positive based on their study day 11 sample SARS-CoV-2 saliva PCR, we count participants as PCR-positive according to whether they have had their first positive SARS-CoV-2 saliva PCR on any study day during period 1 (**during treatment and isolation; D1-D11 inclusive**) or period 2 (**after treatment and isolation; D12-D29**), or not at all.

**Participants who test positive in period 1 are *not* counted in period two. Effectively, they are censored at their first positive saliva PCR as they are no longer at risk of becoming positive for the first time.**

## 2. Inclusion of additional covariates

### Household-level (hh\_cov)

- Number of individuals in the household
- Number of vaccinated individuals in the household
- Viral load (log<sub>10</sub> viral count) of the household index case on study day 1
- Number of individuals in the household with positive saliva PCR *by* the start of the period

**These household level counts consider all household members (index cases and all treatment-eligible and treatment ineligible individuals in the household).**

### Individual-level (indv\_cov)

- Participant eligibility (CE; eligible household contact/NE; non-eligible household contact)
- Participant age
- Participant sex

## 3. Models

- $\text{pcr} \sim (1 \mid \text{household}) + \text{hh\_cov} + \text{indv\_cov} + \text{period}$
- $\text{pcr} \sim (1 \mid \text{household}) + \text{hh\_cov} + \text{indv\_cov} + \text{period} + \text{trt}$
- $\text{pcr} \sim (1 \mid \text{household}) + \text{hh\_cov} + \text{indv\_cov} + \text{period} + \text{trt} + \text{period}:\text{trt}$

We test the hypothesis of an overall treatment effect by comparing model 2 to model 1 using the likelihood ratio test (LRT).

We test the hypothesis of an interaction between period and treatment (i.e., does treatment effect differ between the two periods) by comparing model 3 to model 2 using the likelihood ratio test (LRT).

**P-values less than 0.05 are described as “significant”, as is conventional, but the post-hoc nature of this analysis must be remembered.**

#### 4. Defining eligibility

Following internal discussion, we elected to exclude households from the analysis if:

- The index case subsequently tested negative (by saliva PCR) on both study day 1 AND study day 6 (negative index case)
- There were no negative household members (eligible OR non-eligible) at study day 1 (population at risk = 0)

Show code

Show code

Table 1: Starting number of households per treatment arm.

| trt | n   |
|-----|-----|
| SOC | 169 |
| IFN | 172 |

Show code

Table 2: Breakdown of corresponding participants.

| trt | IC  | CEP | CE  | NE  |
|-----|-----|-----|-----|-----|
| SOC | 169 | 81  | 165 | 150 |
| IFN | 172 | 80  | 177 | 178 |

Show code

Table 3: Number of households with a PCR positive index case.

| trt | n   |
|-----|-----|
| SOC | 149 |
| IFN | 159 |

Show code

Table 4: Breakdown of corresponding participants.

| trt | IC  | CEP | CE  | NE  |
|-----|-----|-----|-----|-----|
| SOC | 149 | 77  | 142 | 134 |
| IFN | 159 | 76  | 164 | 164 |

Show code

Table 5: Households with a PCR positive index case and population at risk > 0 at start of period 1.

| trt | n   |
|-----|-----|
| SOC | 123 |
| IFN | 136 |

Analysis is carried out using this latter number of households.

Show code

## Analysis

Show code

Table 6: Breakdown of corresponding participants.

| trt | IC  | CEP | CE  | NE  |
|-----|-----|-----|-----|-----|
| SOC | 123 | 42  | 142 | 125 |
| IFN | 136 | 49  | 164 | 151 |

While **eligible** contacts (CE) that were PCR(+) at the start of the study are tabulated separately above (as CEP), **ineligible** contacts (NE) that were PCR(+) at the start of the study were not explicitly identified in the same manner. Our analysis considers only the at risk population (at the start of each period), so we further exclude these participants below.

Show code

Table 7: Analysis population: Household contact population excluding those that were PCR(+) on study day 1.

| trt | CE  | NE  |
|-----|-----|-----|
| SOC | 142 | 104 |
| IFN | 164 | 129 |

## Incidence of infection

**Finally**, in order to provide some context, we report the incidence of infection in each study arm during the first period (on treatment; D1-11 inclusive), for eligible and non-eligible household contact populations.

Show code

Table 8: Incidence of infection in the eligible household contact population during treatment.

| arm | trt | uninfected | infected |
|-----|-----|------------|----------|
| CE  | SOC | 107        | 35       |
| CE  | IFN | 135        | 29       |

Show code

Table 9. Incidence of infection in the non-eligible household contact population during treatment.

| arm | trt | uninfected | infected |
|-----|-----|------------|----------|
| NE  | SOC | 79         | 25       |
| NE  | IFN | 103        | 26       |

## Model 2 vs. Model 1

This comparison answers the following question:

Is treatment with IFN associated with a reduction in the number of incident positive saliva PCR in household contacts, adjusting for individual risk factors (age, sex, and treatment eligibility) and household risk factors (num. individuals in household, num. vaccinated individuals, num. infected at start of period, viral load of index case), as well as treatment period (D1-11 vs. D11-29)?

Show code

| term | npar   | AIC     | BIC     | logLik   | deviance | statistic | df    | p.value |
|------|--------|---------|---------|----------|----------|-----------|-------|---------|
| mod0 | 12.000 | 622.676 | 681.117 | -299.338 | 598.676  |           |       |         |
| mod1 | 13.000 | 620.136 | 683.446 | -297.068 | 594.136  | 4.541     | 1.000 | 0.033   |

Show code

| coef           | 2.5 % | OR    | 97.5 % |
|----------------|-------|-------|--------|
| (Intercept)    | 0.024 | 0.061 | 0.596  |
| hh_size        | 0.803 | 1.002 | 1.177  |
| hh_num_vacc    | 0.859 | 1.094 | 1.323  |
| hh_viral_log10 | 1.022 | 1.346 | 1.614  |
| hh_inf_start   | 0.896 | 1.212 | 1.529  |
| armNE          | 0.398 | 0.928 | 2.021  |
| sexM           | 0.365 | 0.490 | 0.810  |
| age2           | 0.457 | 1.213 | 2.932  |
| age3           | 0.417 | 1.065 | 2.512  |

|               |       |       |       |
|---------------|-------|-------|-------|
| age4          | 0.291 | 0.471 | 1.257 |
| period(11,30] | 0.108 | 0.141 | 0.266 |
| trtIFN        | 0.364 | 0.550 | 0.989 |

## Conclusion

**Treatment with IFN is associated with a significant reduction in the odds of a positive saliva PCR for all household contacts compared to standard of care ( $p = 0.033$ ; OR = 0.550, 95% CI = 0.364 to 0.989).**

## Model 3 vs. Model 2

This comparison answers the following question:

Does the effect of treatment on the number of incident positive saliva PCR in household contacts change between study periods?

Show code

| term | npar   | AIC     | BIC     | logLik   | deviance | statistic | df    | p.value |
|------|--------|---------|---------|----------|----------|-----------|-------|---------|
| mod0 | 12.000 | 618.151 | 676.592 | -297.076 | 594.151  |           |       |         |
| mod1 | 13.000 | 619.077 | 682.387 | -296.538 | 593.077  | 1.075     | 1.000 | 0.300   |

Show code

| coef           | 2.5 % | OR    | 97.5 % |
|----------------|-------|-------|--------|
| (Intercept)    | 0.031 | 0.060 | 0.520  |
| hh_size        | 0.811 | 1.006 | 1.188  |
| hh_num_vacc    | 0.866 | 1.093 | 1.332  |
| hh_viral_log10 | 1.021 | 1.347 | 1.579  |
| hh_inf_start   | 0.851 | 1.193 | 1.501  |
| sexM           | 0.347 | 0.489 | 0.812  |
| age2           | 0.738 | 1.299 | 2.124  |
| age3           | 0.631 | 1.136 | 1.960  |
| age4           | 0.297 | 0.498 | 1.023  |
| period(11,30]  | 0.055 | 0.098 | 0.237  |

|                      |       |       |       |
|----------------------|-------|-------|-------|
| trtIFN               | 0.394 | 0.505 | 0.980 |
| period(11,30]:trtIFN | 0.710 | 1.917 | 4.703 |

## Conclusion

**Inconclusive: the effect of treatment does not appear to change between period 1 and period 2 ( $p = 0.300$ ).**

Show code

The point estimate for the treatment effect in the second period is OR = 0.968 (95% CI = 0.405 to 2.840) compared to OR = 0.550 (95% CI = 0.364 to 0.989) in the first period.

## Summary Statement

In this *exploratory* analysis of the PCR results during periods 1 and 2 using the larger HC study population (eligible plus ineligible household contacts), and additionally considering treatment periods (during treatment, D1-D11; after treatment, D12-D29), IFN given to treatment eligible household contacts (and the COVID(+) index case) significantly reduced the odds of positive PCR results for all (non-positive at study day 1) household contacts (IFN likelihood ratio test  $p = 0.033$ ; OR = 0.550, 95% CI = 0.364 to 0.989). Positive PCR tests are significantly less common in the second period (OR = 0.141, 95% CI = 0.108 to 0.266). The results for treatment and period summarized above were taken from the second model which excluded the treatment by period interaction as the interaction term was not significant (interaction LRT  $p = 0.300$ ).

# Figures

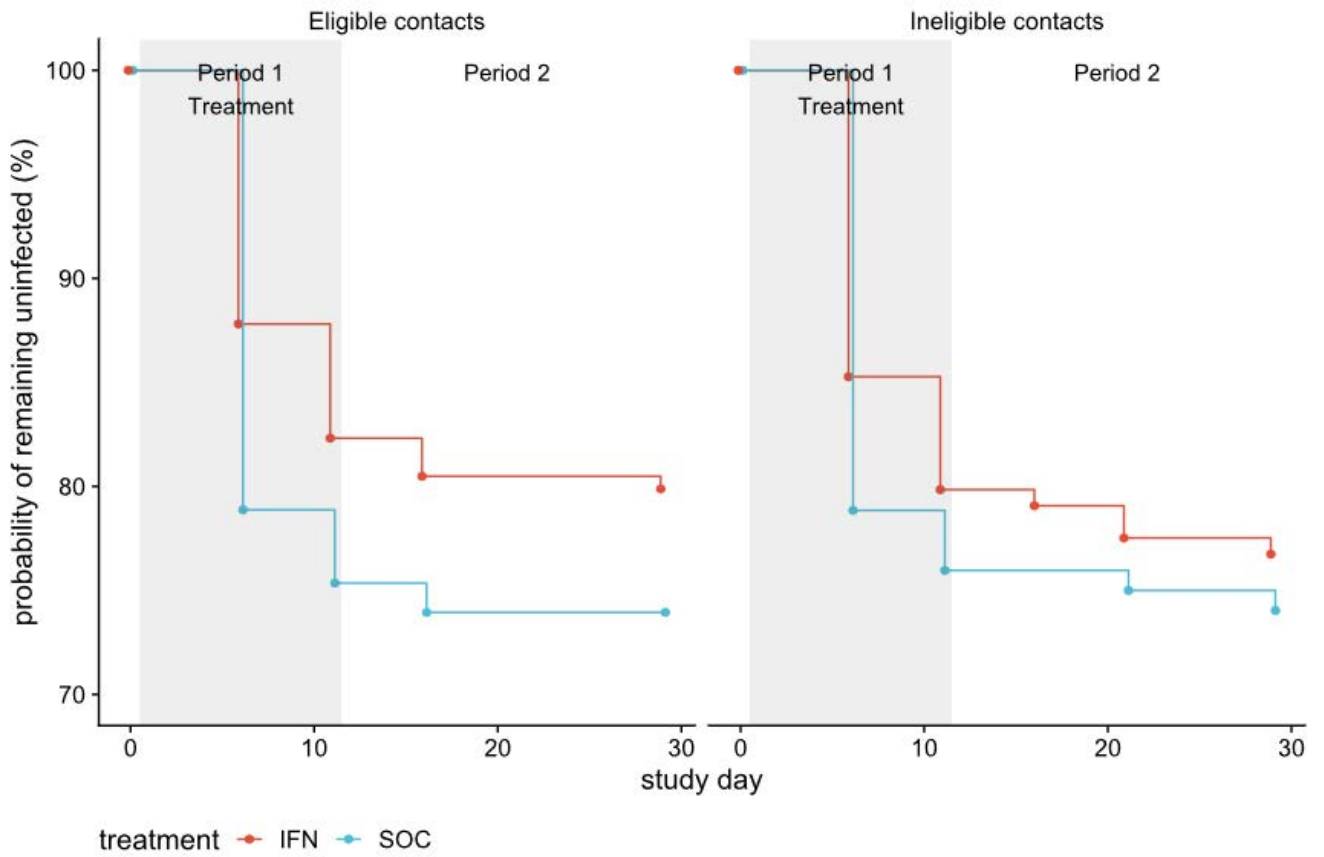

Figure 1: Treatment eligible (left) or ineligible (right) household contact population at risk over time stratified by randomization (red, treatment [IFN]; blue, standard of care).
